# Supplementary material for: Enhancing the Comprehensive Stability of Candida parapsilosis Carbonyl Reductase in Biphasic Systems through Rational Protein Design
Source: Research Square preprint supplement (doi:10.21203/rs.3.rs-8821063/v1), 2026-02-15

Docking of protein 4OAQ with acetophenone

according to the instructions for the Discovery Studio 2017 packages

**1. Pre-docking Preparation of Protein and Acetophenone**
1.1 Obtaining the 3D Structure File of Acetophenone

Search databases including ZINC and PubChem using the chemical name of acetophenone to obtain the 3D structure file in .SDF format.


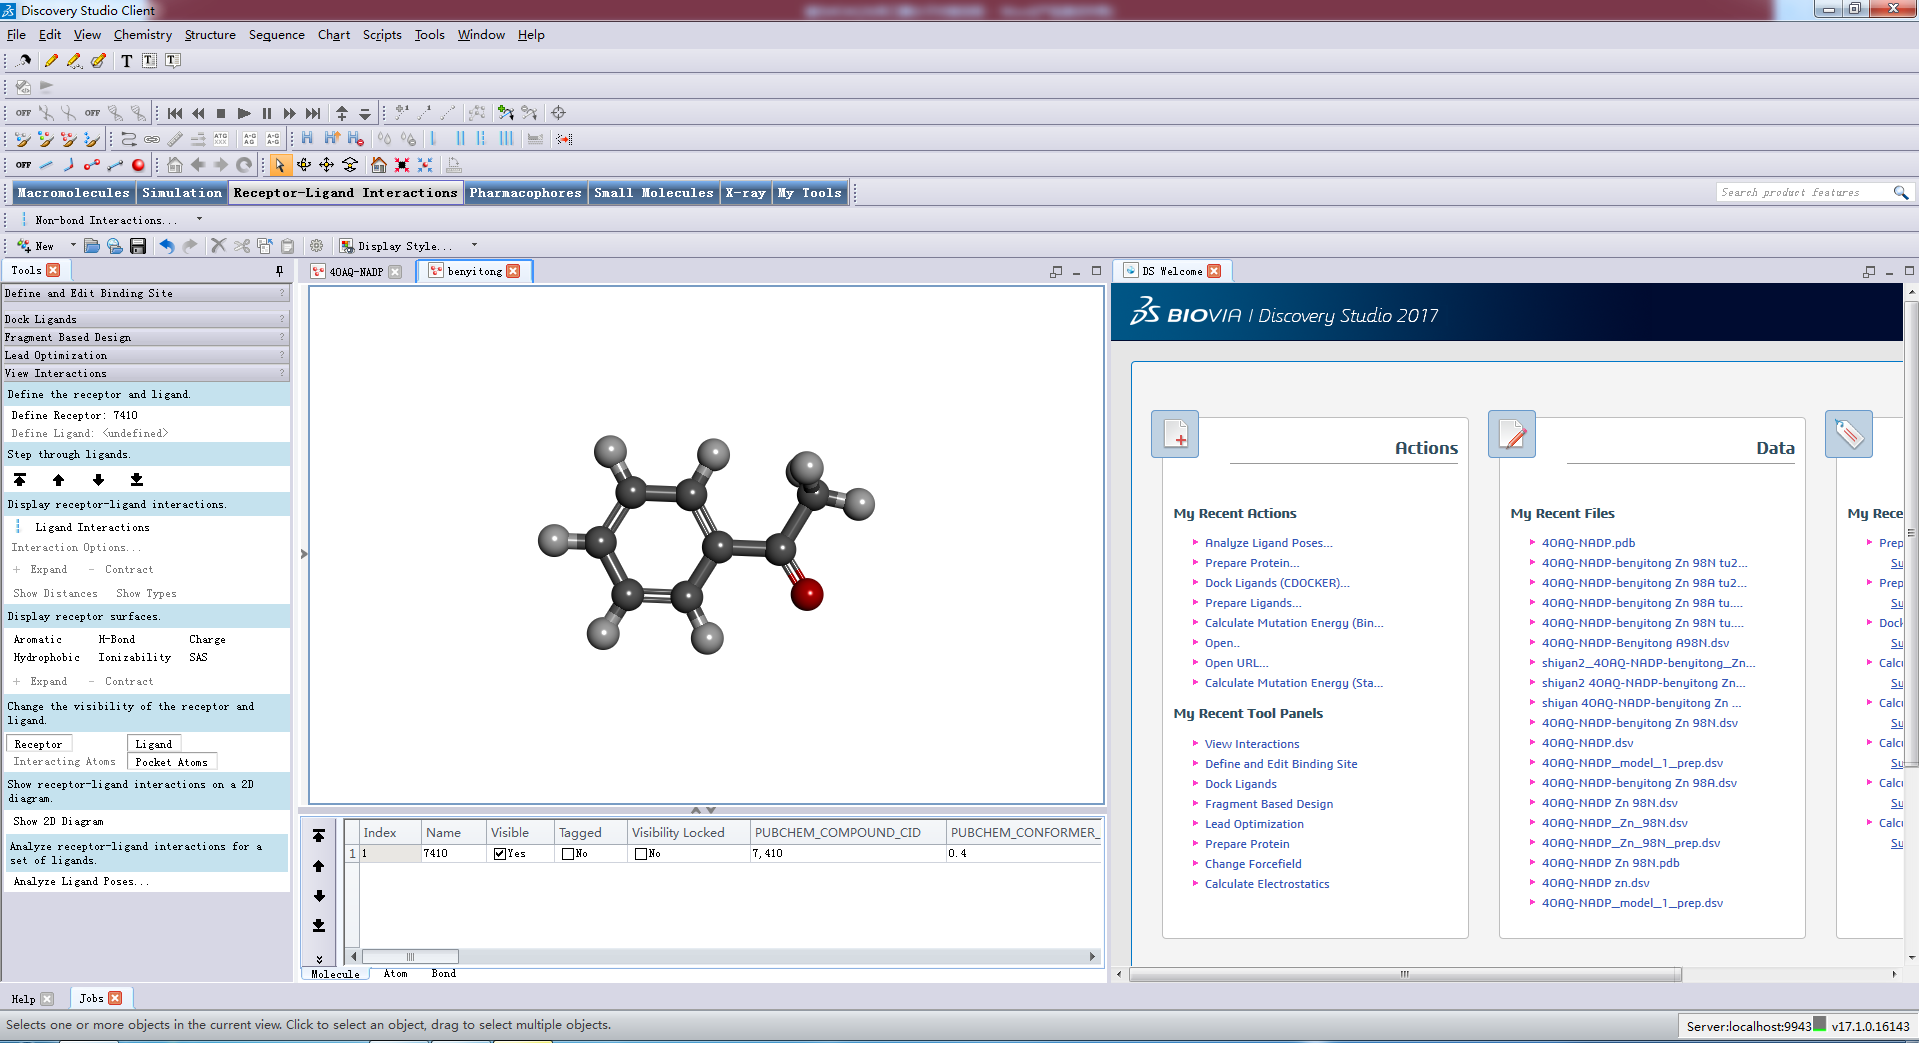


1.2 Acquisition of the Protein Structure File

The protein structure file can be acquired either by directly searching and downloading it from the PDB database using the protein name, or within the DS software by clicking on the "File" menu, selecting "OPEN URL", and entering the protein name, which will allow the software to open the file directly.


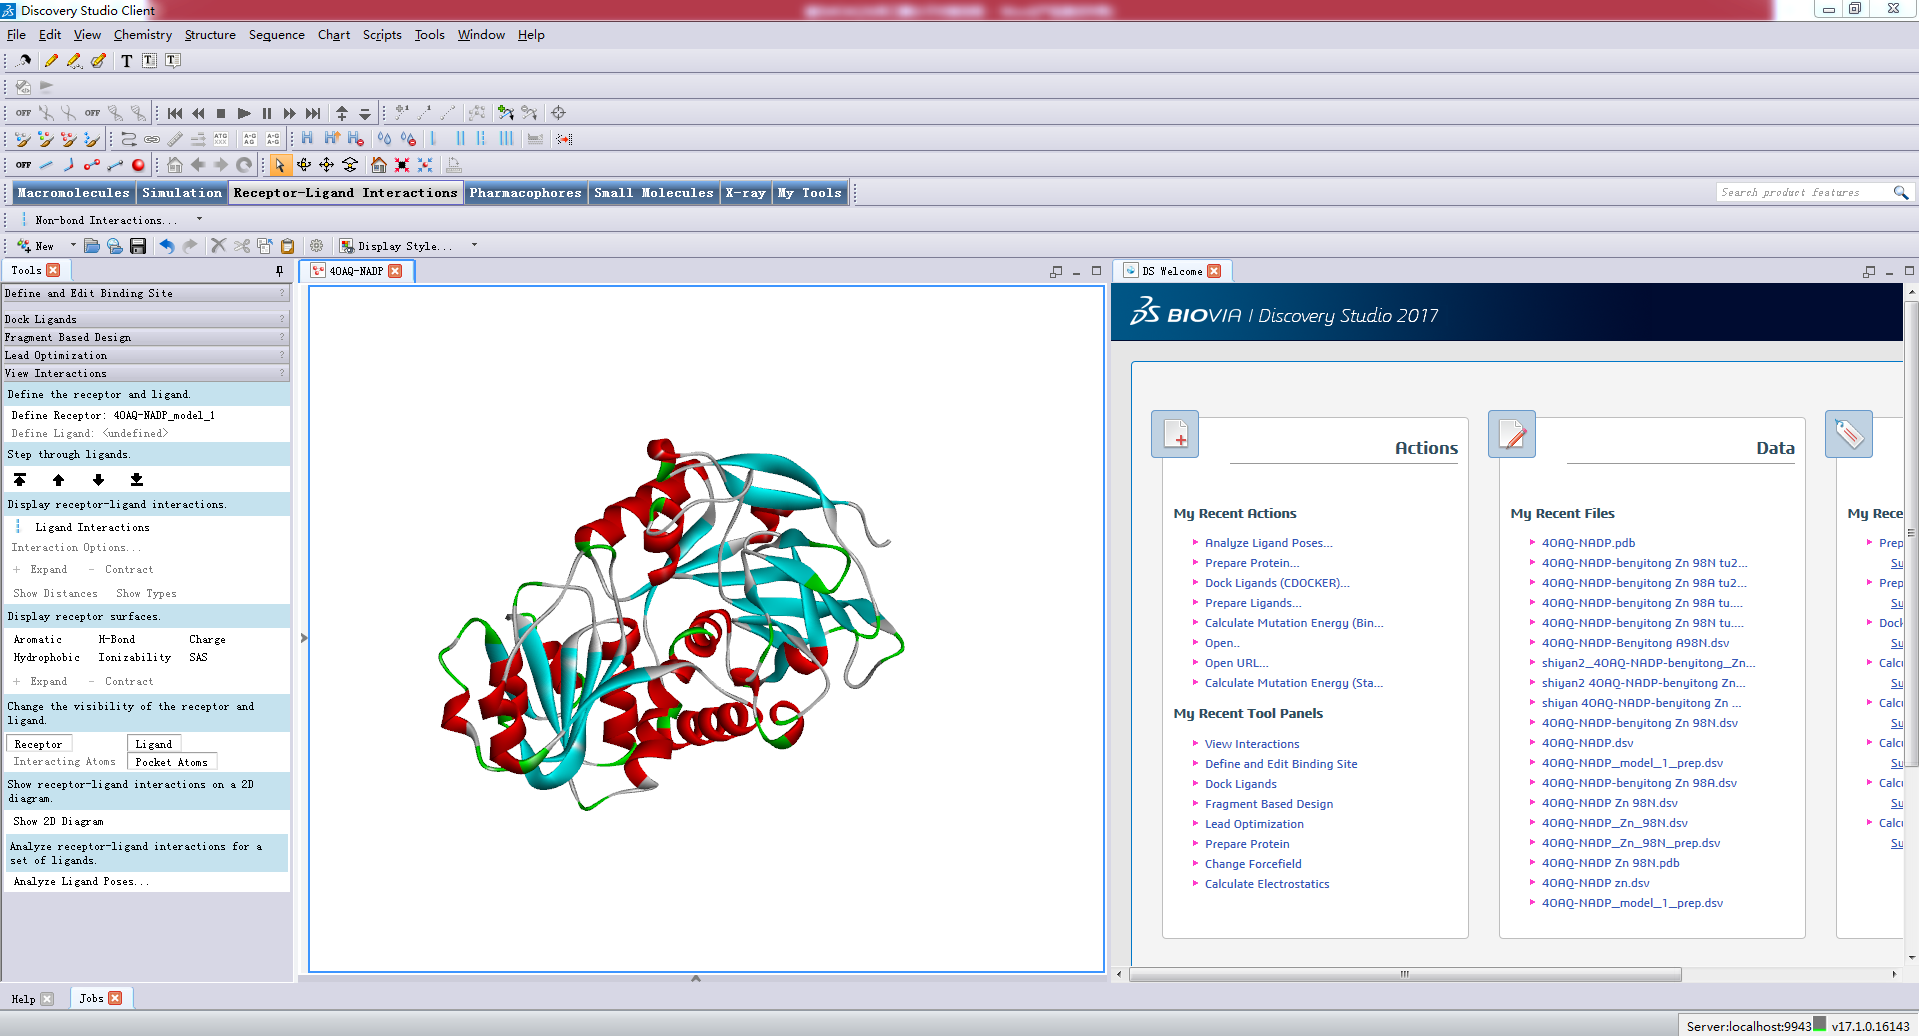


**2 Ligand Preparation:**

The ligand molecule in .SDF format is opened in DS software and processed by sequentially clicking through the steps. The preparation parameters are kept at their default values without any changes, and the procedure is run directly.


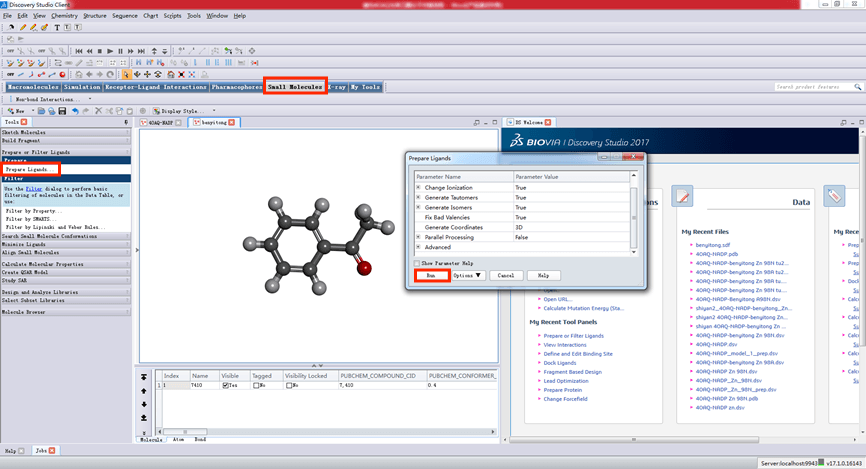


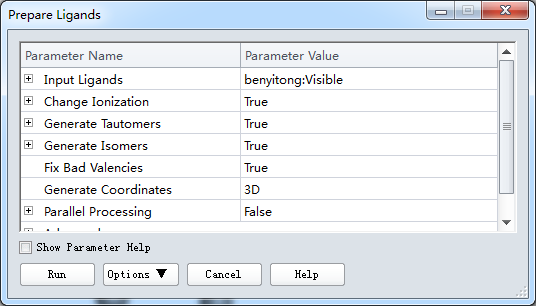


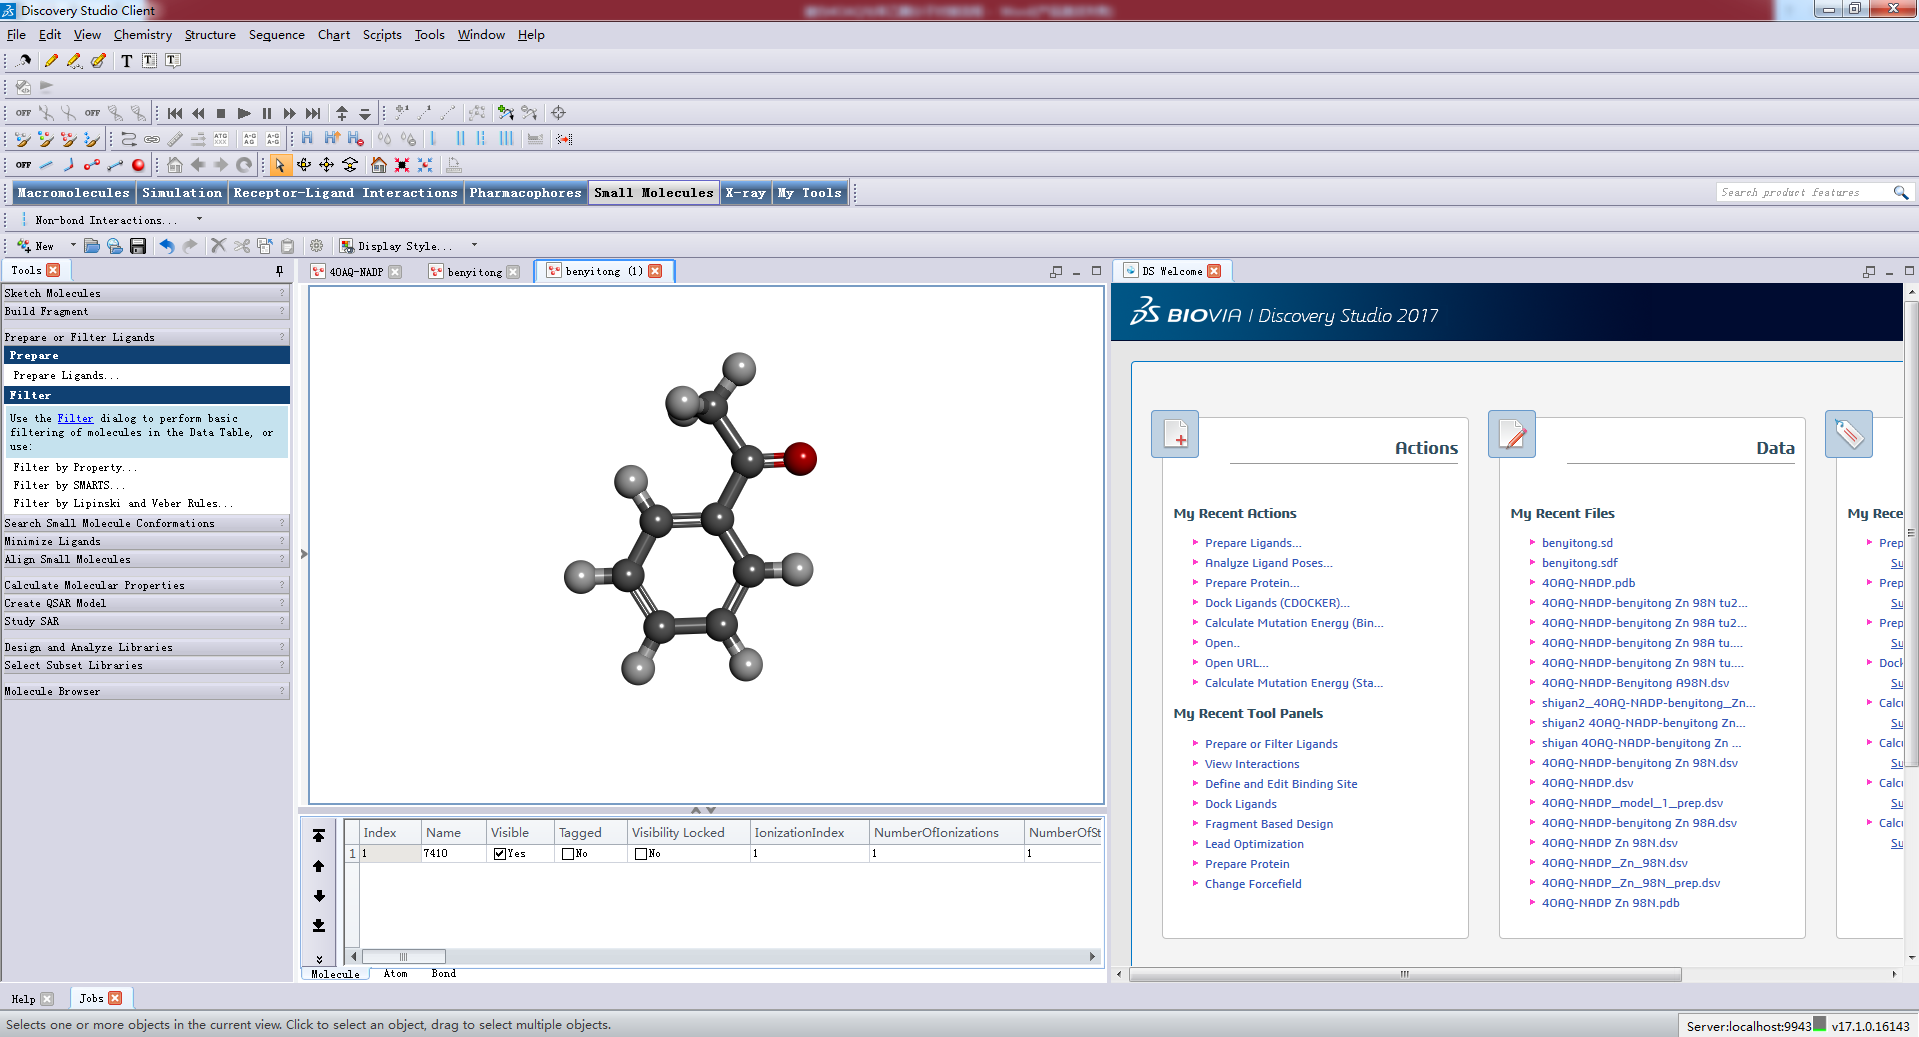


**3 Protein Preparation**

Click the following buttons in sequence, keep the system parameters at their default values, and run the program directly.


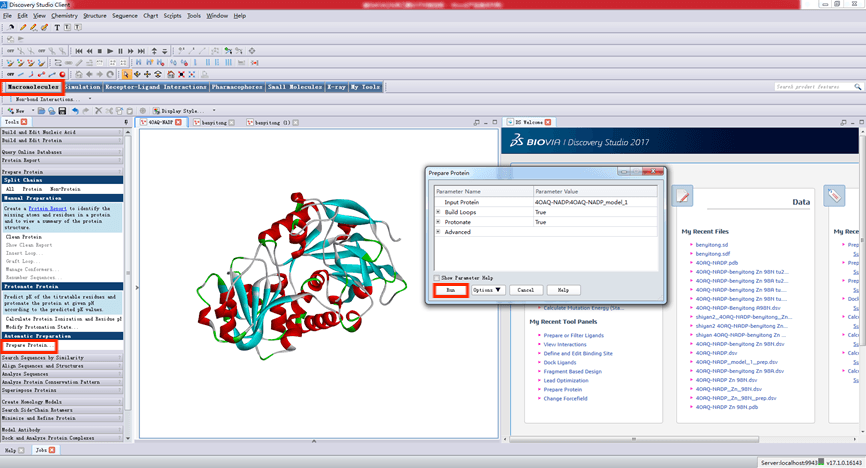


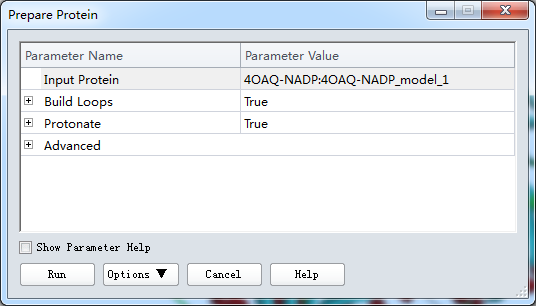


4、run

The prepared protein is obtained, and the protein file contains the "_prep" suffix.


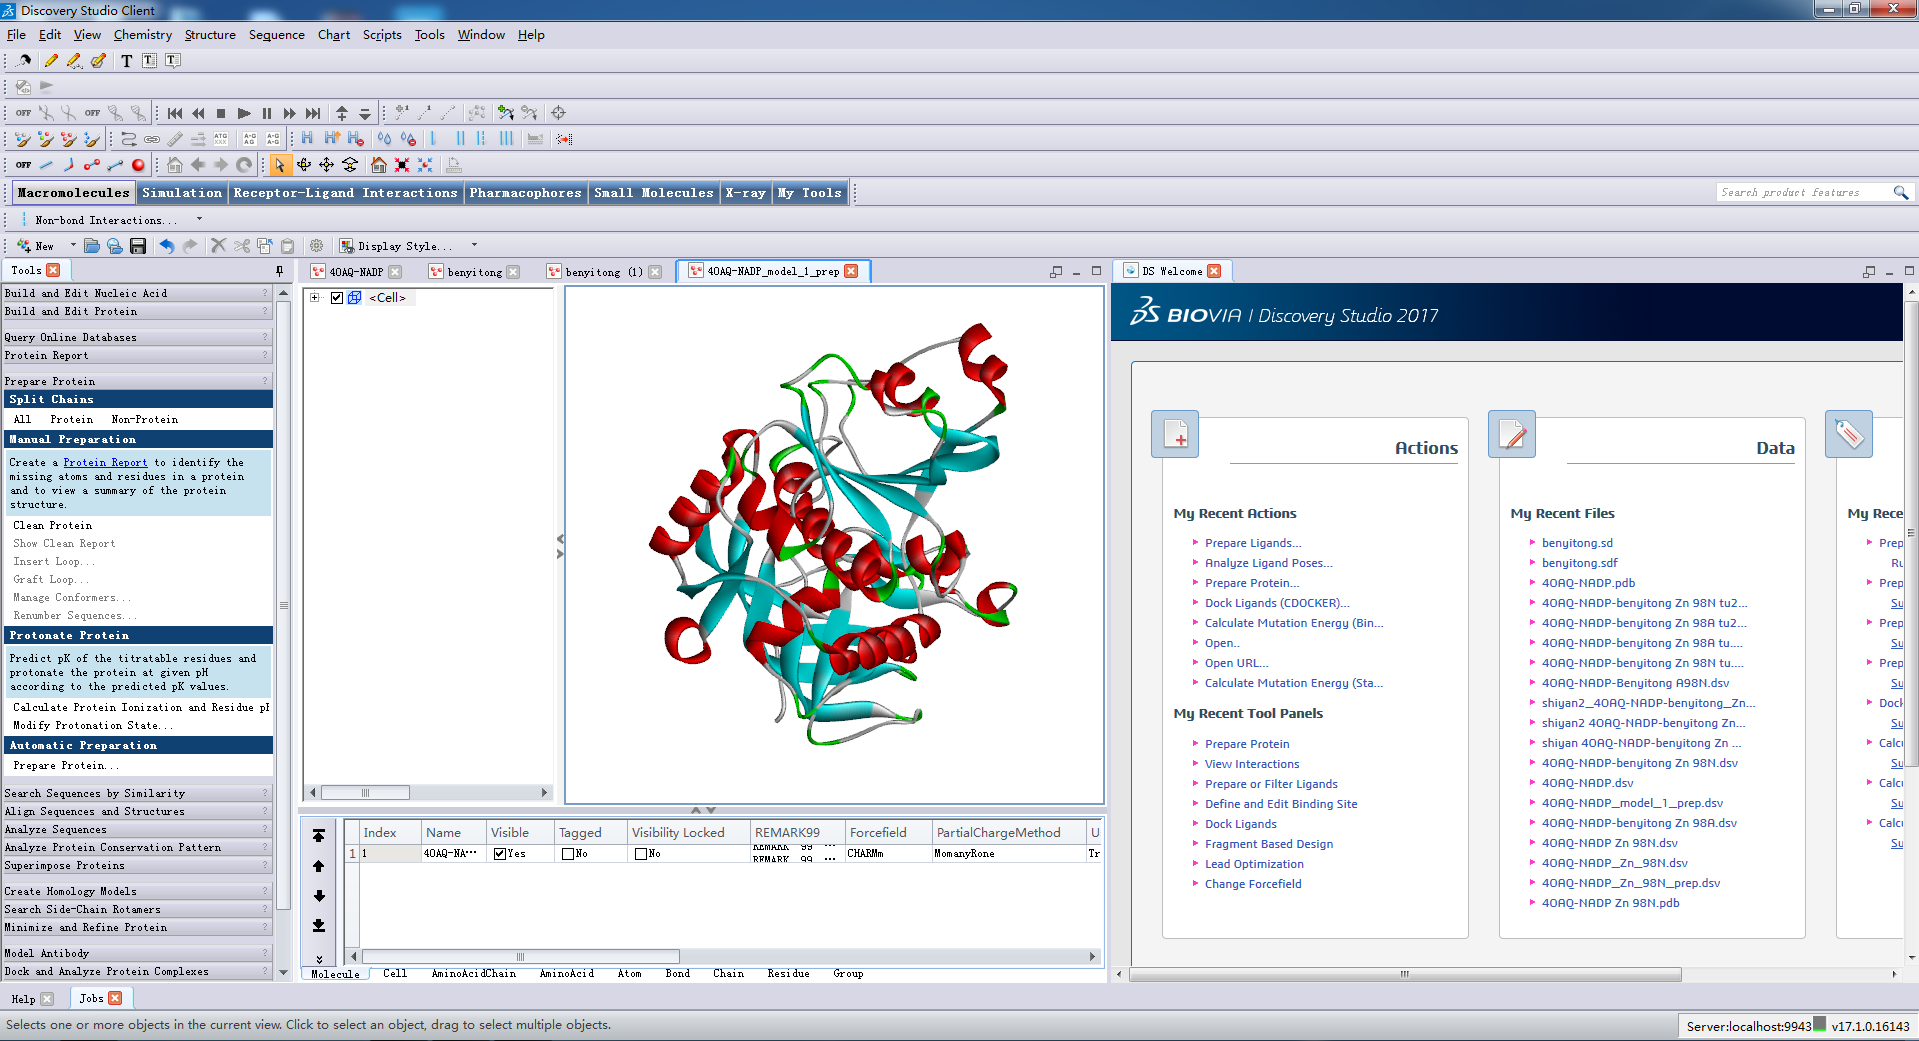


**5、Docking Preparation**
First, define the protein.
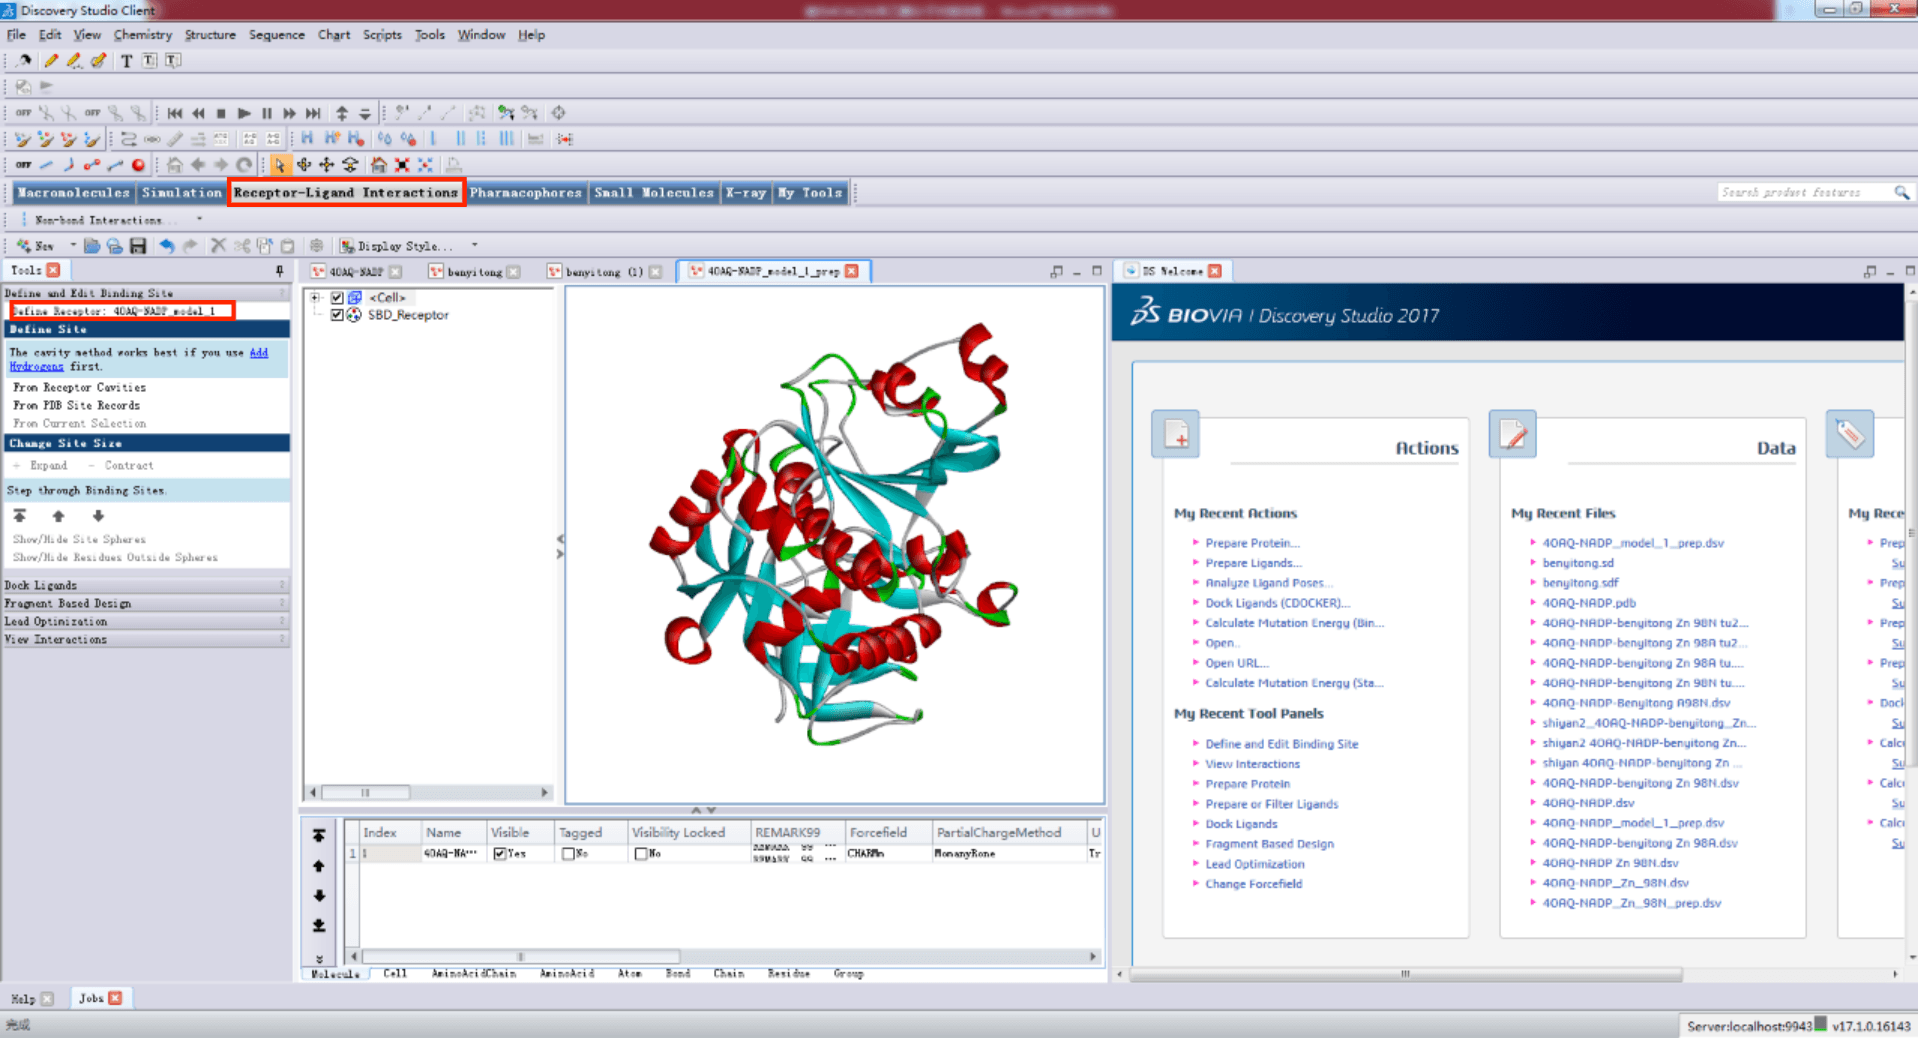


Visualize the active center.
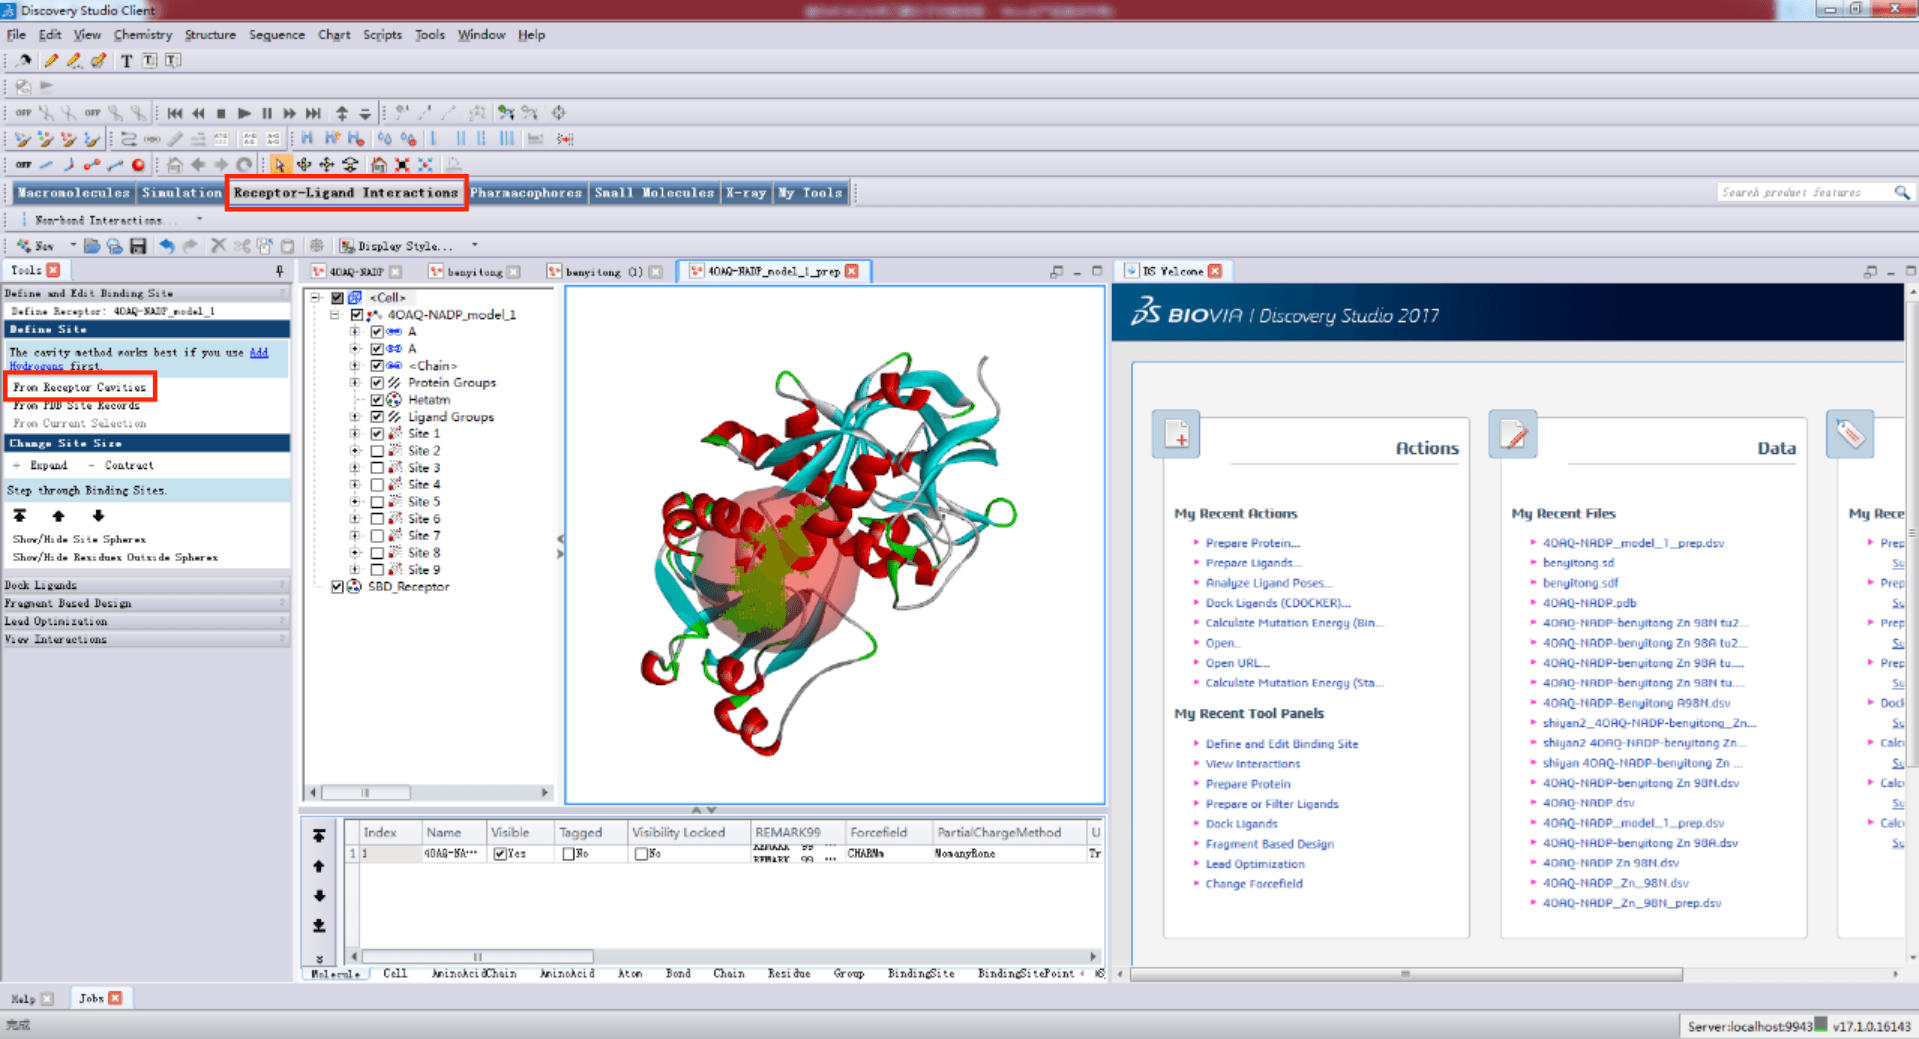


Select the appropriate active site and right-click to modify its properties
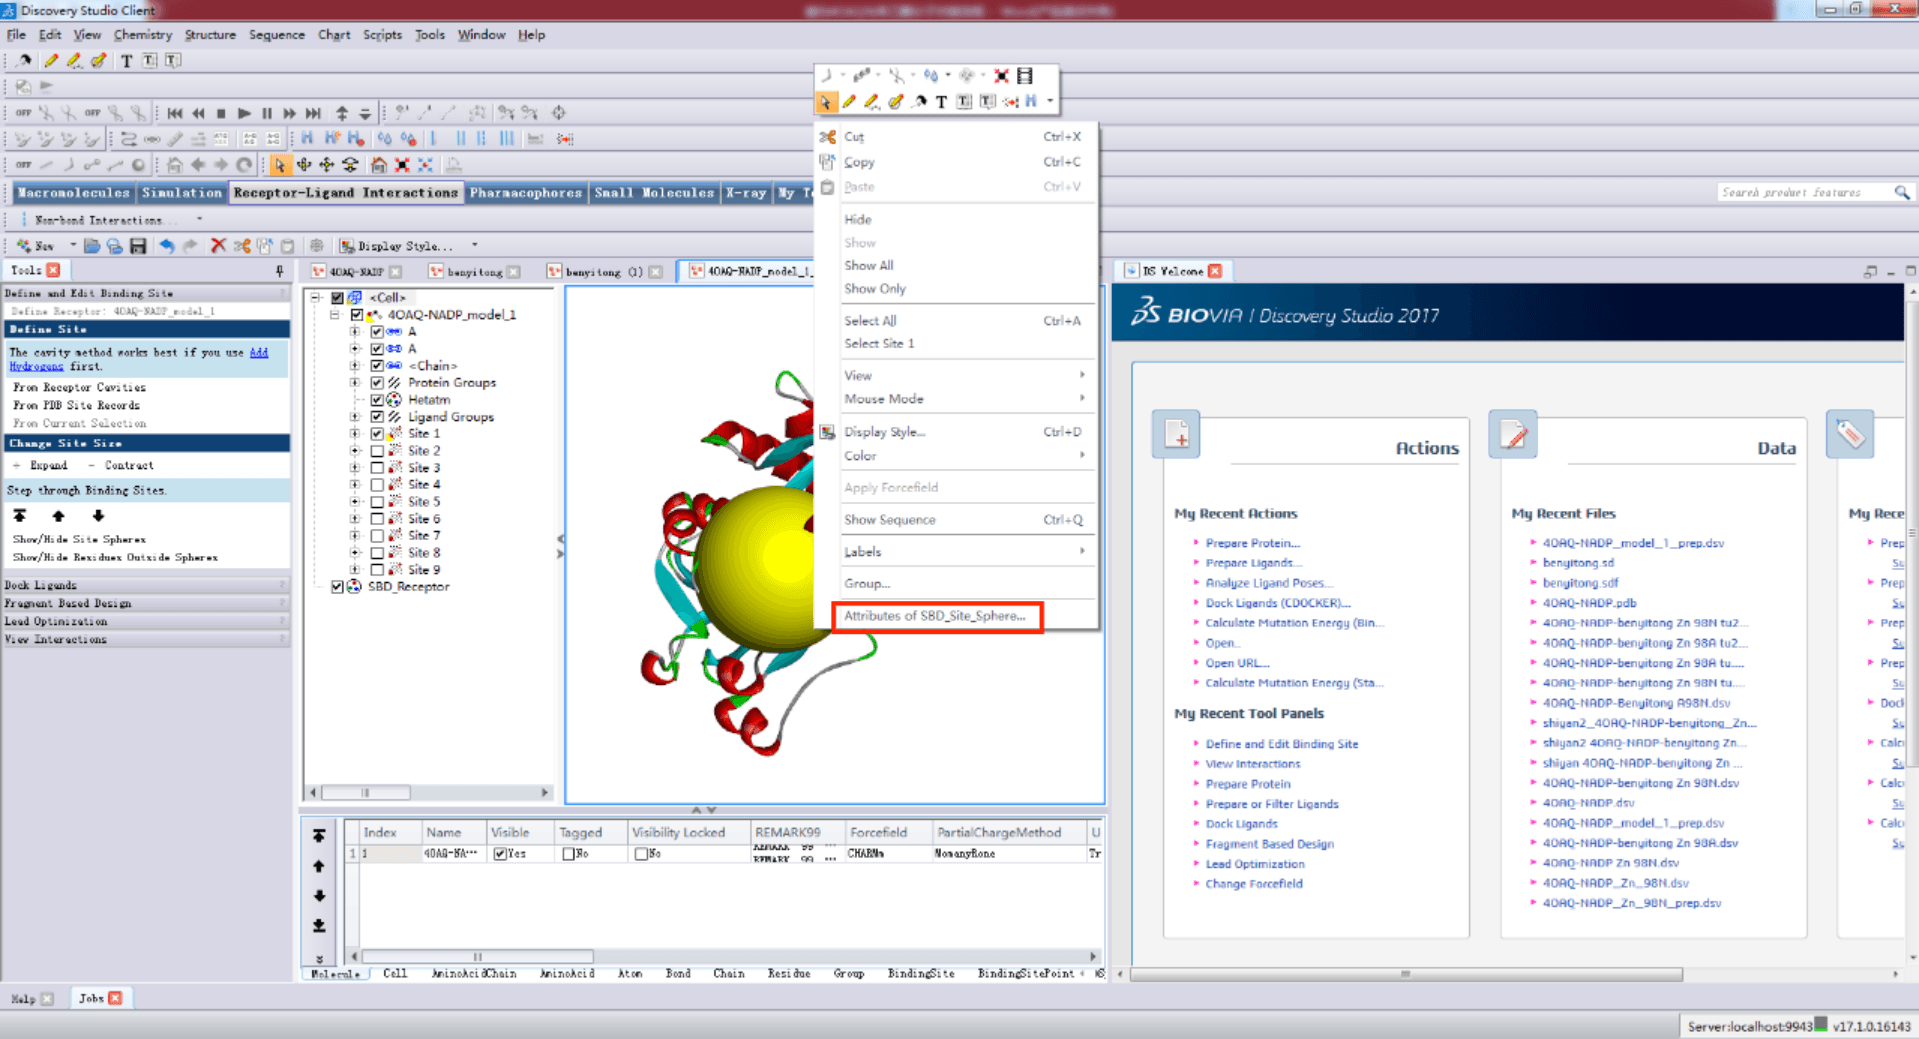


Change the radius to a suitable value. In cases where the initial radius is large, a value of around 10 Å is recommended.
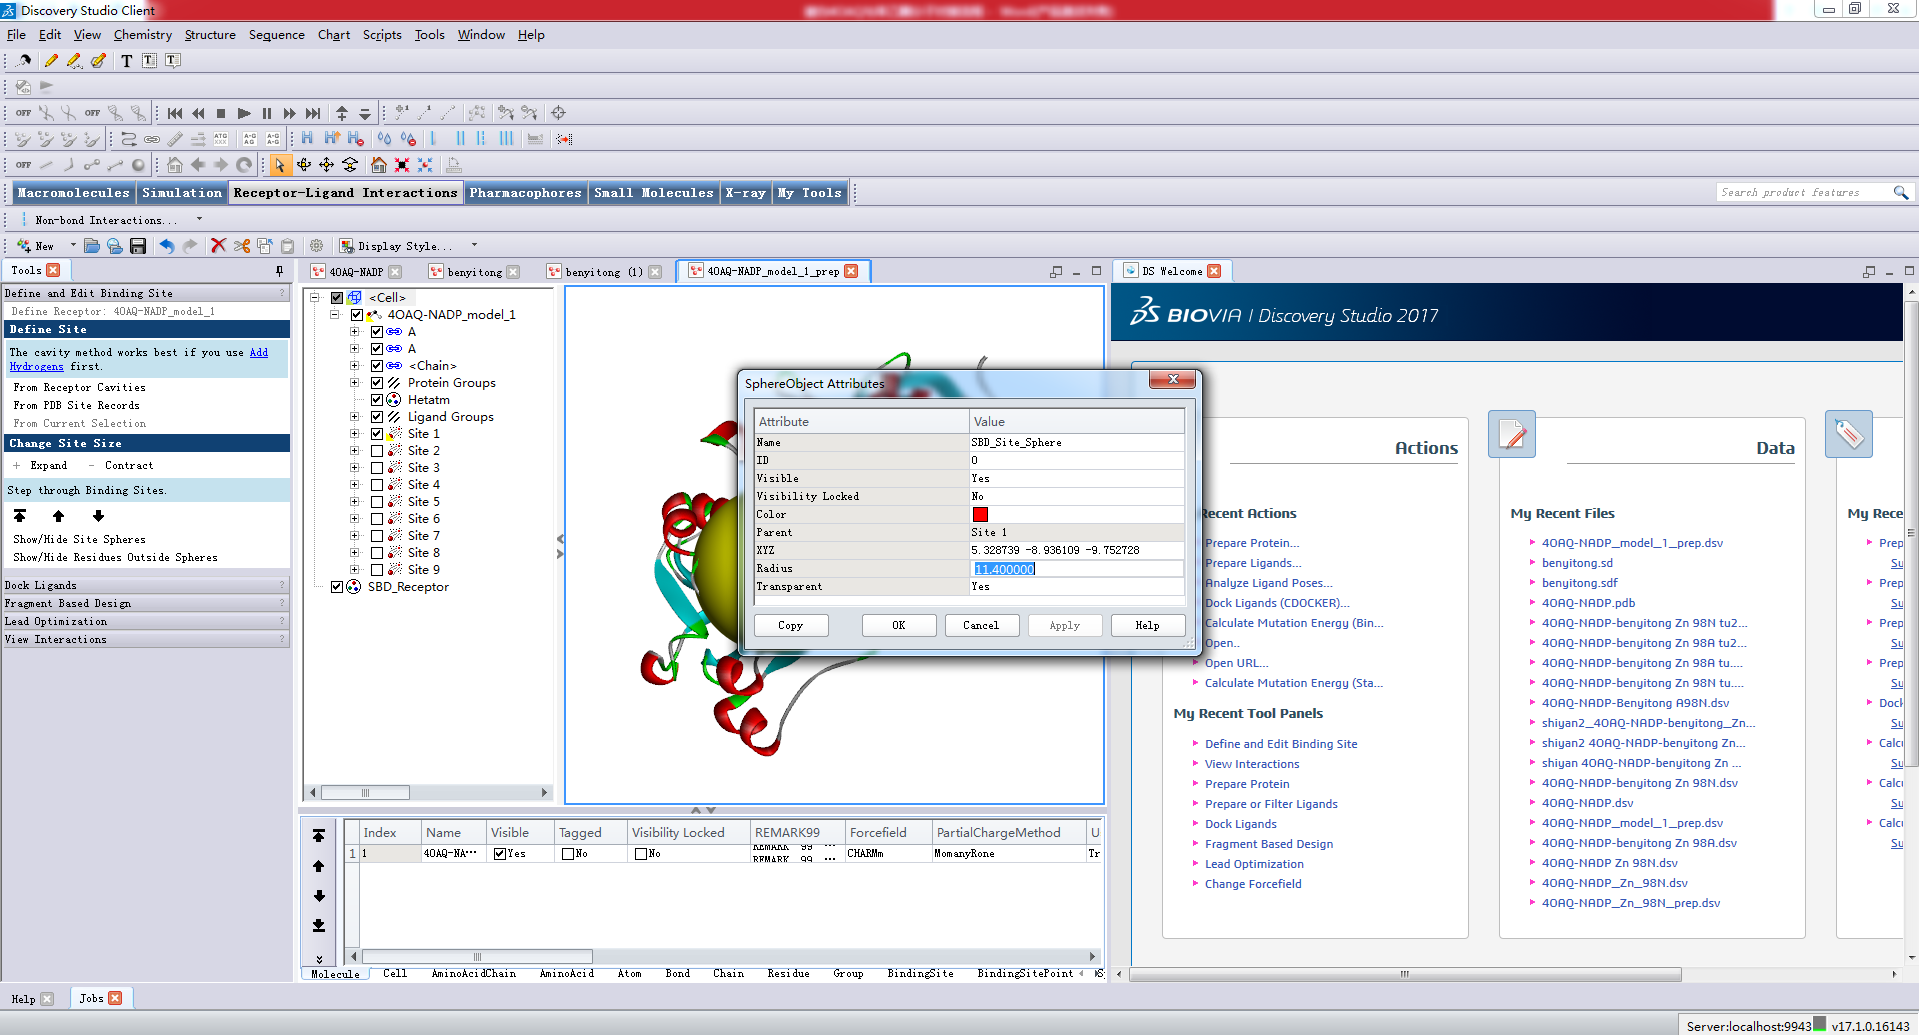

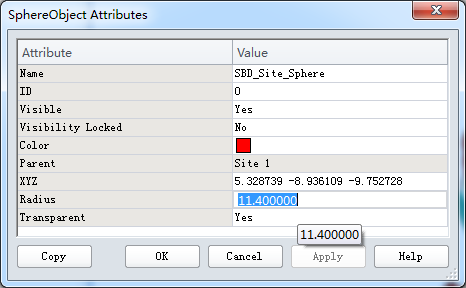


**6. Initiate Docking**

Select the prepared acetophenone ligand from the Input Ligands options, then change the value under Top His to 0.5. All other parameters remain at their system default values and require no modification.


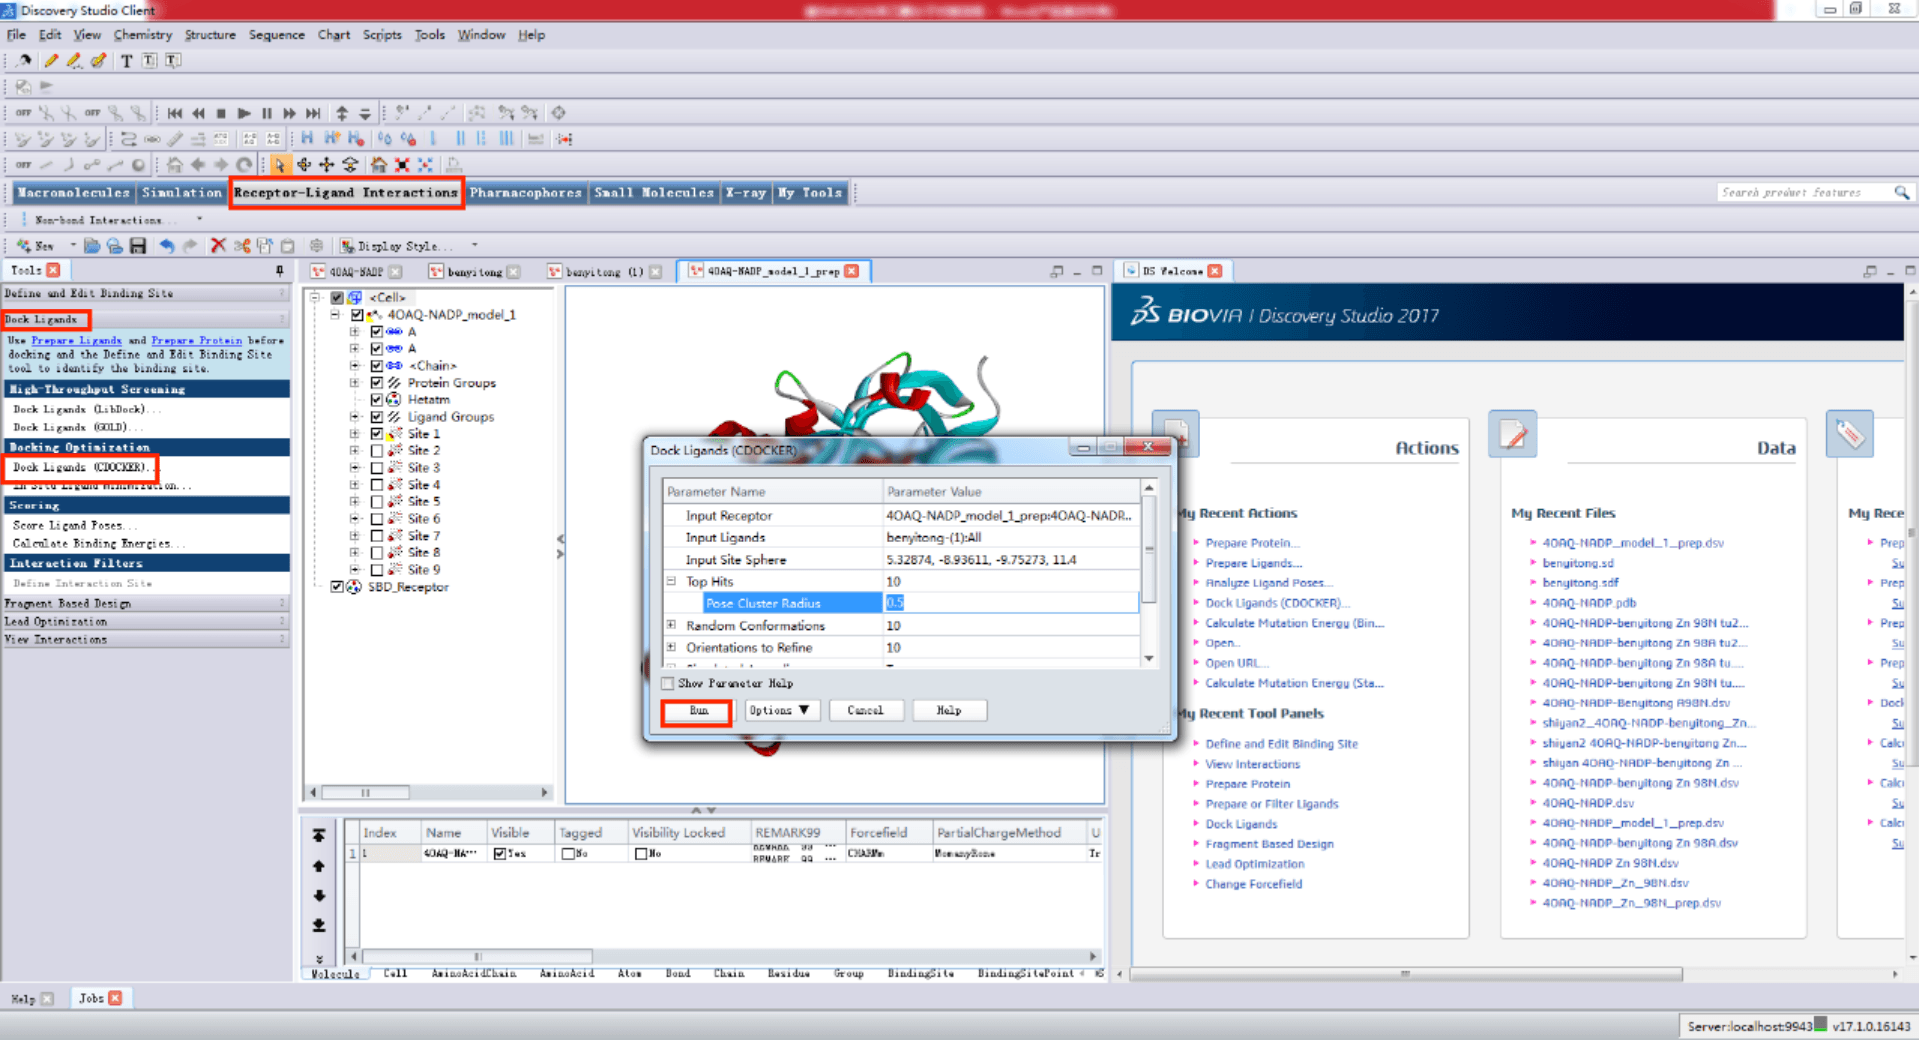


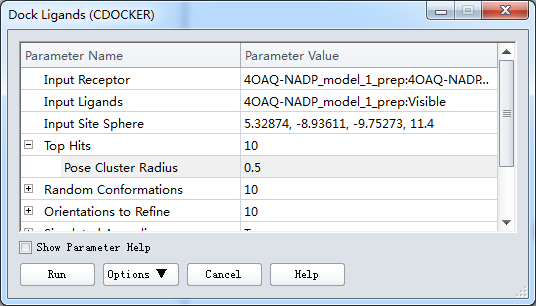


Run

The docking results are displayed upon completion of the run.


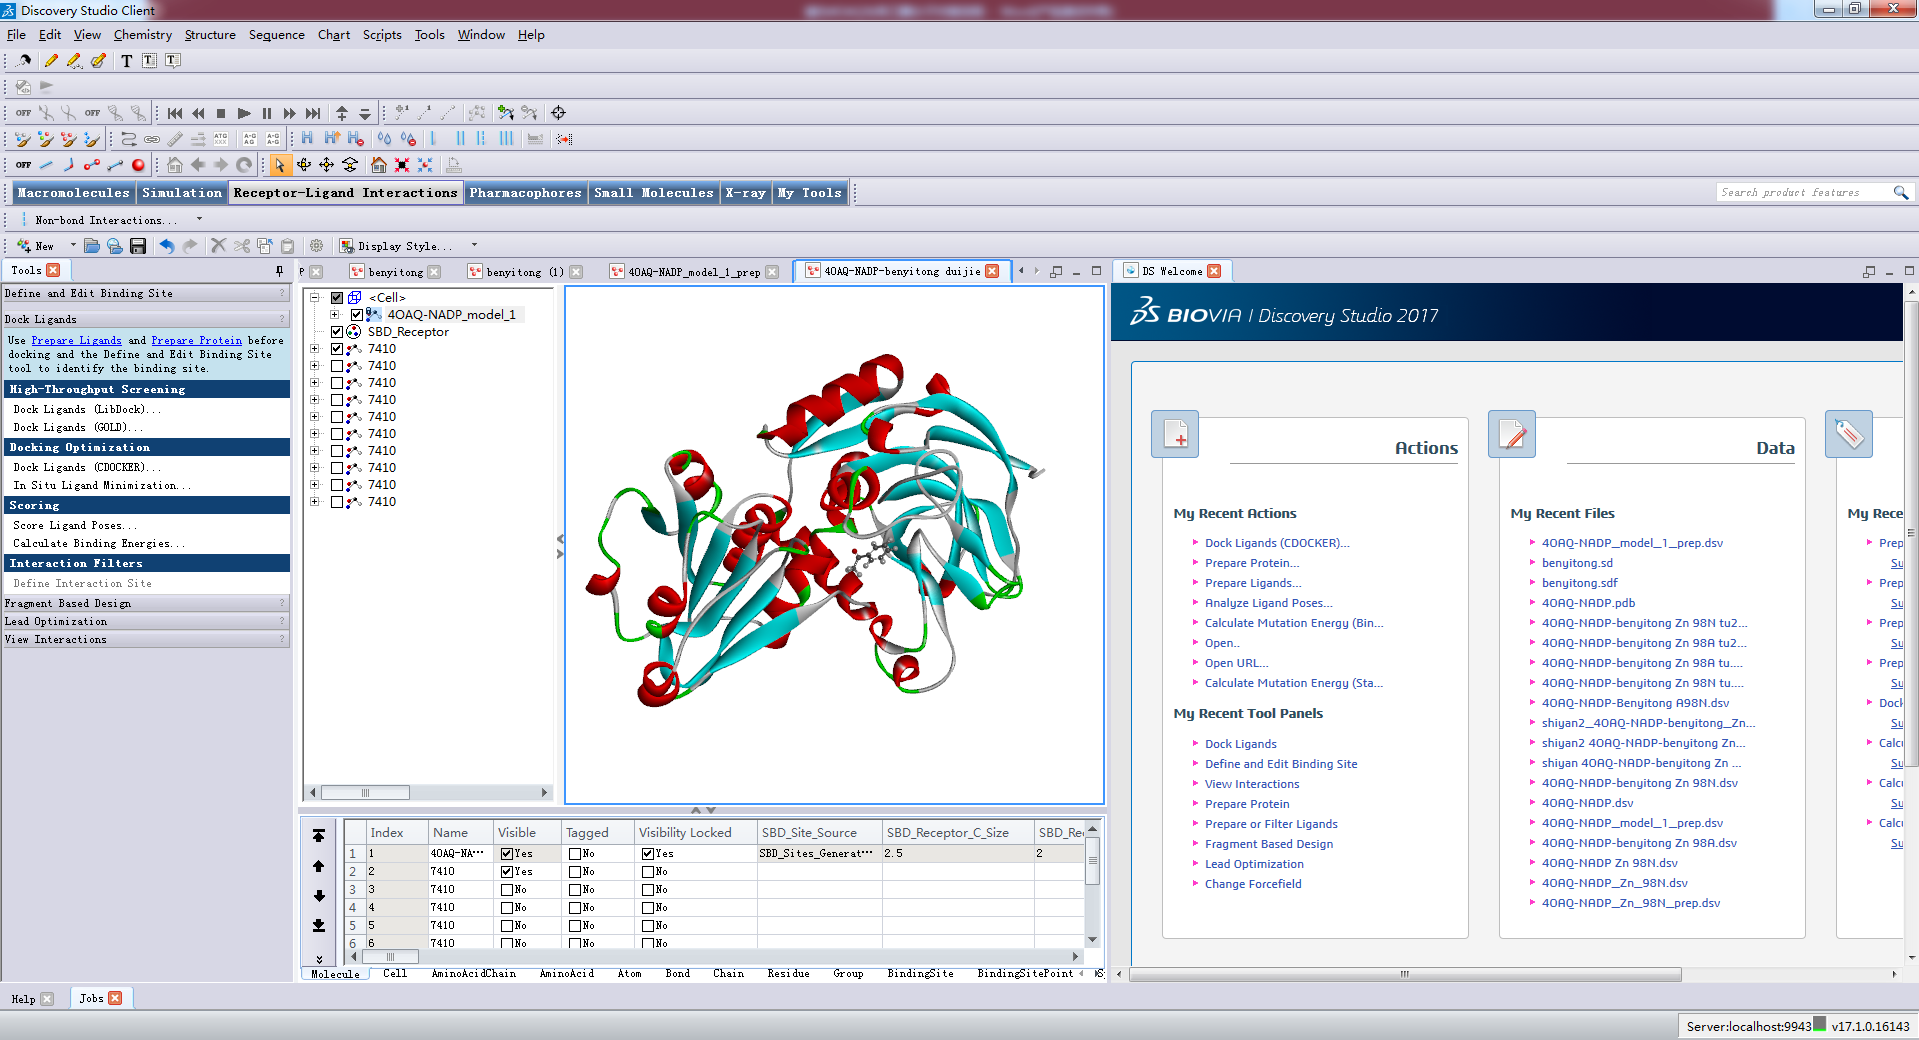

Supplement: Supplementary file 2 [file 2e55de24814e82fe47d82bf5.docx]
