# Supplementary material for: Enhancing the Comprehensive Stability of Candida parapsilosis Carbonyl Reductase in Biphasic Systems through Rational Protein Design
Source: Research Square preprint supplement (doi:10.21203/rs.3.rs-8821063/v1), 2026-02-15
Supplement: Supplementary file 3 [file 6f27b94856d35833b31636ed.xlsx]

## Sheet: Sheet1
Fig4. Relative enzyme activities of WTCpCR and its mutants in PB buffer（Single mutants）					Fig5. Relative enzyme activities of CpCR Double mutants in PB buffer					Enzyme half-life of wtCpCR in PB、n-hexane/PB and MTBE/PB systems				Fig.6 Biphasic interface stability of WTCpCR and mutants.
CpCR variants	enzyme activities/(U/mL)	Relative enzyme activities/%	Er±		CpCR variants	enzyme activities/(U/mL)	Relative enzyme activities/%	Er±		systems	Enzyme half-life/h	Er		CpCR variants	①PB （Enzyme half-life/h）	Relative stability	Er±(Relative stability）	② n-hexane/PBS systems（Enzyme half-life/h）	Relative stability	Er±(Relative stability）	③MTBE/PBS system（Enzyme half-life/min）	Relative stability	Er±(Relative stability）
WTCpCR	12.93	100	5		WTCpCR	12.93	100	4		PB	20.77	1.2		WTCpCR	20.77	1	0.04	15.7	1	0.06	25.8	1	0.03
G262N	9.26	72	2		G262N/A98N	13.96	108	3		n-hexane/PB system	15.7	1		G262N	25.07	1.21	0.05	14.5	0.92	0.05	36	1.34	0.05
S216N	2.03	16	1		G262N/S216N	11.63	90	5		MTBE/PB system	0.43	0.05		S216N	11.23	0.55	0.03	3.3	0.21	0.02	20	0.77	0.03
S258N	11	85	3		G262N/S258N	9.83	76	4						S258N	25.97	1.25	0.05	6.11	0.39	0.03	17.5	0.68	0.02
A98N	14.52	112	6		S216N/A98N	13.32	103	5						A98N	28.01	1.35	0.05	8.46	0.34	0.04	30.2	1.17	0.05
S307N	0	0			S258N/A98N	13.19	102	4						G262N/A98N	31.08	1.49	0.04	14.1	0.9	0.03	64	2.48	0.06
					S258N/S216N	8.92	69	3
Fig.9 Oxidative stability profiles of WTCpCR and its mutants.										Fig.7 Thermostability of WTCpCR and its mutants.				Fig.8 Shear stress stability profiles of WTCpCR and its mutants
CpCR variants	Aerobic condition（Enzyme half-life/h）	Er±	Anaerobic condition（Enzyme half-life/h）	Er±						CpCR variants	T50/℃	Er±		CpCR variants	100rpm（Enzyme half-life/h）	Relative stability	Er±	200rpm（Enzyme half-life/h）	Relative stability	Er±	300rpm（Enzyme half-life/h）	Relative stability	Er±
WTCpCR	8.21	0.14	9.82	0.14						WTCpCR	37	2.1		WTCpCR	7.72	1	0.05	4.47	1	0.04	3.33	1	0.06
G262N	11.37	0.25	7.92	0.25						G262N	36	2		G262N	8.47	1.1	0.05	6.79	1.52	0.1	4.46	1.34	0.12
A98N	7.05	0.16	4.39	0.16						S216N	31	1.5		S258N	11.1	1.44	0.13	4.22	0.94	0.05	2.92	0.88	0.04
G262N/A98N	10.89	0.18	7.75	0.18						S258N	32	2		A98N	7.99	1.03	0.14	5.94	1.34	0.12	4.76	1.42	0.05
										A98N	33	1		G262N/A98N	10	1.3	0.09	8.13	1.82	0.15	6.69	2.01	0.14
										G262N/A98N	36.5	1.5
Fig.10 NADPH concentration-dependent stabilization of WTCpCR and its mutants
CpCR variants	Enzyme half-life/h（C=0.002mM）	Er±	Enzyme half-life/h（C=0.02mM）	Er±	Enzyme half-life/h（C=0.2mM）	Er±	Enzyme half-life/h（C=0.4mM）	Er±
WTCpCR	13.34	0.8	18.1	0.6	20.82	0.5	19.77	0.6
G262N	15.33	0.7	16.81	0.4	22.99	0.8	22.4	0.6
A98N	10.62	0.5	13.1	0.4	15.24	0.5	16.24	0.7
G262N/A98N	14.59	0.6	15.89	0.5	21.72	0.6	21.37	0.5
