# Supplementary material for: Enhancing the Comprehensive Stability of Candida parapsilosis Carbonyl Reductase in Biphasic Systems through Rational Protein Design
Source: Research Square preprint supplement (doi:10.21203/rs.3.rs-8821063/v1), 2026-02-15
Supplement: Supplementary file 4 [file 7aae211e59bf3d838c624c1c.xlsx]

## Sheet: Sheet1
		Biphasic interface stability of WTCpCR and G262 Mutants
		CpCR variants	Mutation effect prediction	①PB （Enzyme half-life/h）	Relative stability	Er±(Relative stability）	② n-hexane/PBS systems（Enzyme half-life/h）	Relative stability	Er±(Relative stability）	③MTBE/PBS system（Enzyme half-life/min）	Relative stability	Er±(Relative stability）
		WTCpCR		20.77	1	0.04	15.7	1	0.06	25.8	1	0.03
		G262N	stabilizing	25.07	1.21	0.05	14.5	0.92	0.05	36	1.34	0.05
		G262S	destabilizing	15.23	0.86	0.03	12.4	0.79	0.04	22.5	0.87	0.02
		G262T	destabilizing	16.59	0.89	0.03	13.6	0.87	0.04	22.9	0.89	0.03
		G262Q	neutral	19.33	0.96	0.04	15.3	0.99	0.05	26.1	1.01	0.03
		G262C	destabilizing	14.95	0.81	0.03	12.3	0.78	0.03	20.5	0.79	0.02
