# Supplementary material for: Enhancing the Comprehensive Stability of Candida parapsilosis Carbonyl Reductase in Biphasic Systems through Rational Protein Design
Source: Research Square preprint supplement (doi:10.21203/rs.3.rs-8821063/v1), 2026-02-15
Supplement: Supplementary file 6 [file a32ea7bdedb697742754a80c.docx]

| | 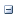**Results** | | --- | |
| --- | --- |
| | **Summary** |  | | --- | --- |  | | | 52 Single Mutations generated for G0(Phenylacetone)-4OAQ-A-Zn20-SP_model_1 | | --- | | | --- | --- | | | | **Index** | **Mutation** | **Mutation Energy (kcal/mol)** | **Effect** | | --- | --- | --- | --- | | 1 | A:ALA98>ASN | -3.24 | STABILIZING | | 2 | A:SER307>ASN | -2.08 | STABILIZING | | 3 | A:ALA121>ASN | -1.41 | STABILIZING | | 4 | A:GLY262>ASN | -1.32 | STABILIZING | | 5 | A:SER216>ASN | -1.23 | STABILIZING | | 48 | A:TYR355>ASN | 3.84 | DESTABILIZING | | 49 | A:GLY193>ASN | 4.04 | DESTABILIZING | | 50 | A:GLY282>ASN | 5.29 | DESTABILIZING | | 51 | A:TRP59>ASN | 5.35 | DESTABILIZING | | 52 | A:GLY198>ASN | 5.36 | DESTABILIZING |   The table reports up to 5 lowest energy and up to 5 highest energy mutations. For the full list of results click the links in the Results section. | | --- | --- | --- | --- | --- | --- | --- | --- | --- | --- | --- | --- | --- | --- | --- | --- | --- | --- | --- | --- | --- | --- | --- | --- | --- | --- | --- | --- | --- | --- | --- | --- | --- | --- | --- | --- | --- | --- | --- | --- | --- | --- | --- | --- | --- | | | | --- | --- | --- | --- | --- | --- | --- | --- | --- | --- | --- | --- | --- | --- | --- | --- | --- | --- | --- | --- | --- | --- | --- | --- | --- | --- | --- | --- | --- | --- | --- | --- | --- | --- | --- | --- | --- | --- | --- | --- | --- | --- | --- | --- | --- | --- | --- | --- | --- | |
| | 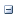**Results** | | --- | | | |
| | **Summary** |  | | --- | --- |  | | | 52 Single Mutations generated for G0（phenylacetone）-4OAQ-A-Zn20-SP_model_1 | | --- | | | --- | --- | | | | **Index** | **Mutation** | **Mutation Energy (kcal/mol)** | **Effect** | | --- | --- | --- | --- | | 1 | A:GLY262>ALA | -0.64 | STABILIZING | | 2 | A:SER307>ALA | -0.52 | STABILIZING | | 3 | A:SER125>ALA | -0.36 | NEUTRAL | | 4 | A:ASP261>ALA | -0.24 | NEUTRAL | | 5 | A:SER216>ALA | -0.18 | NEUTRAL | | 48 | A:ARG356>ALA | 5.61 | DESTABILIZING | | 49 | A:TYR355>ALA | 5.69 | DESTABILIZING | | 50 | A:TRP59>ALA | 5.80 | DESTABILIZING | | 51 | A:TYR123>ALA | 5.89 | DESTABILIZING | | 52 | A:GLY193>ALA | 9.97 | DESTABILIZING |   The table reports up to 5 lowest energy and up to 5 highest energy mutations. For the full list of results click the links in the Results section. | | --- | --- | --- | --- | --- | --- | --- | --- | --- | --- | --- | --- | --- | --- | --- | --- | --- | --- | --- | --- | --- | --- | --- | --- | --- | --- | --- | --- | --- | --- | --- | --- | --- | --- | --- | --- | --- | --- | --- | --- | --- | --- | --- | --- | --- | | | | --- | --- | --- | --- | --- | --- | --- | --- | --- | --- | --- | --- | --- | --- | --- | --- | --- | --- | --- | --- | --- | --- | --- | --- | --- | --- | --- | --- | --- | --- | --- | --- | --- | --- | --- | --- | --- | --- | --- | --- | --- | --- | --- | --- | --- | --- | --- | --- | --- | | | |
