# Supplementary material for: Enhancing the Comprehensive Stability of Candida parapsilosis Carbonyl Reductase in Biphasic Systems through Rational Protein Design
Source: Research Square preprint supplement (doi:10.21203/rs.3.rs-8821063/v1), 2026-02-15
Supplement: Supplementary file 7 [file d845794365b0b404018def45.docx]

**Calculate Mutation Energy (Binding)**

| | **Summary** |  | | --- | --- |  | | | 57 Single Mutations generated for G21-4OAQ-A-Zn20-SP_model_1 | | --- | | | --- | --- | | | | **Index** | **Mutation** | **Mutation Energy (kcal/mol)** | **Effect** | | --- | --- | --- | --- | | 1 | A:SER50>PHE | -1.01 | STABILIZING | | 2 | A:THR171>PHE | -0.67 | STABILIZING | | 3 | A:ALA121>PHE | -0.65 | STABILIZING | | 4 | A:CYS167>PHE | -0.58 | STABILIZING | | 5 | A:SER125>PHE | -0.51 | STABILIZING | | 53 | A:THR54>PHE | 0.18 | NEUTRAL | | 54 | A:LEU309>PHE | 0.41 | NEUTRAL | | 55 | A:TRP59>PHE | 0.68 | DESTABILIZING | | 56 | A:LEU308>PHE | 1.62 | DESTABILIZING | | 57 | A:ALA97>PHE | 2.88 | DESTABILIZING |   The table reports up to 5 lowest energy and up to 5 highest energy mutations. For the full list of results click the links in the Results section. | | --- | --- | --- | --- | --- | --- | --- | --- | --- | --- | --- | --- | --- | --- | --- | --- | --- | --- | --- | --- | --- | --- | --- | --- | --- | --- | --- | --- | --- | --- | --- | --- | --- | --- | --- | --- | --- | --- | --- | --- | --- | --- | --- | --- | --- | | | | --- | --- | --- | --- | --- | --- | --- | --- | --- | --- | --- | --- | --- | --- | --- | --- | --- | --- | --- | --- | --- | --- | --- | --- | --- | --- | --- | --- | --- | --- | --- | --- | --- | --- | --- | --- | --- | --- | --- | --- | --- | --- | --- | --- | --- | --- | --- | --- | --- | |
| --- | --- | --- | --- | --- | --- | --- | --- | --- | --- | --- | --- | --- | --- | --- | --- | --- | --- | --- | --- | --- | --- | --- | --- | --- | --- | --- | --- | --- | --- | --- | --- | --- | --- | --- | --- | --- | --- | --- | --- | --- | --- | --- | --- | --- | --- | --- | --- | --- | --- | --- | --- |
| | 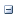**Results** | | --- | |

| | **Summary** |  | | --- | --- |  | | | 57 Single Mutations generated for G21-4OAQ-A-Zn20-SP_model_1 | | --- | | | --- | --- | | | | **Index** | **Mutation** | **Mutation Energy (kcal/mol)** | **Effect** | | --- | --- | --- | --- | | 1 | A:THR171>TRP | -1.06 | STABILIZING | | 2 | A:HIS71>TRP | -0.76 | STABILIZING | | 3 | A:SER50>TRP | -0.56 | STABILIZING | | 4 | A:VAL281>TRP | -0.30 | NEUTRAL | | 5 | A:CYS167>TRP | -0.30 | NEUTRAL | | 53 | A:ALA98>TRP | 1.16 | DESTABILIZING | | 54 | A:SER125>TRP | 2.12 | DESTABILIZING | | 55 | A:ALA121>TRP | 2.67 | DESTABILIZING | | 56 | A:LEU309>TRP | 3.64 | DESTABILIZING | | 57 | A:ALA97>TRP | 4.62 | DESTABILIZING |   The table reports up to 5 lowest energy and up to 5 highest energy mutations. For the full list of results click the links in the Results section. | | --- | --- | --- | --- | --- | --- | --- | --- | --- | --- | --- | --- | --- | --- | --- | --- | --- | --- | --- | --- | --- | --- | --- | --- | --- | --- | --- | --- | --- | --- | --- | --- | --- | --- | --- | --- | --- | --- | --- | --- | --- | --- | --- | --- | --- | | | | --- | --- | --- | --- | --- | --- | --- | --- | --- | --- | --- | --- | --- | --- | --- | --- | --- | --- | --- | --- | --- | --- | --- | --- | --- | --- | --- | --- | --- | --- | --- | --- | --- | --- | --- | --- | --- | --- | --- | --- | --- | --- | --- | --- | --- | --- | --- | --- | --- | |
| --- | --- | --- | --- | --- | --- | --- | --- | --- | --- | --- | --- | --- | --- | --- | --- | --- | --- | --- | --- | --- | --- | --- | --- | --- | --- | --- | --- | --- | --- | --- | --- | --- | --- | --- | --- | --- | --- | --- | --- | --- | --- | --- | --- | --- | --- | --- | --- | --- | --- | --- | --- |
| | 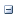**Results** | | --- | |

| | **Summary** |  | | --- | --- |  | | | 57 Single Mutations generated for G21-4OAQ-A-Zn20-SP_model_1 | | --- | | | --- | --- | | | | **Index** | **Mutation** | **Mutation Energy (kcal/mol)** | **Effect** | | --- | --- | --- | --- | | 1 | A:ALA97>ASN | -0.82 | STABILIZING | | 2 | A:SER50>ASN | -0.61 | STABILIZING | | 3 | A:ALA98>ASN | -0.41 | NEUTRAL | | 4 | A:THR171>ASN | -0.21 | NEUTRAL | | 5 | A:CYS48>ASN | -0.19 | NEUTRAL | | 53 | A:LEU308>ASN | 0.33 | NEUTRAL | | 54 | A:THR54>ASN | 0.35 | NEUTRAL | | 55 | A:HIS71>ASN | 0.36 | NEUTRAL | | 56 | A:TYR123>ASN | 0.56 | DESTABILIZING | | 57 | A:TRP59>ASN | 0.89 | DESTABILIZING |   The table reports up to 5 lowest energy and up to 5 highest energy mutations. For the full list of results click the links in the Results section. | | --- | --- | --- | --- | --- | --- | --- | --- | --- | --- | --- | --- | --- | --- | --- | --- | --- | --- | --- | --- | --- | --- | --- | --- | --- | --- | --- | --- | --- | --- | --- | --- | --- | --- | --- | --- | --- | --- | --- | --- | --- | --- | --- | --- | --- | | | | --- | --- | --- | --- | --- | --- | --- | --- | --- | --- | --- | --- | --- | --- | --- | --- | --- | --- | --- | --- | --- | --- | --- | --- | --- | --- | --- | --- | --- | --- | --- | --- | --- | --- | --- | --- | --- | --- | --- | --- | --- | --- | --- | --- | --- | --- | --- | --- | --- | |
| --- | --- | --- | --- | --- | --- | --- | --- | --- | --- | --- | --- | --- | --- | --- | --- | --- | --- | --- | --- | --- | --- | --- | --- | --- | --- | --- | --- | --- | --- | --- | --- | --- | --- | --- | --- | --- | --- | --- | --- | --- | --- | --- | --- | --- | --- | --- | --- | --- | --- | --- | --- |
| | 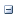**Results** | | --- | |

| | **Summary** |  | | --- | --- |  | | | 59 Single Mutations generated for G22-4OAQ-A-Zn20-SP_model_1 | | --- | | | --- | --- | | | | **Index** | **Mutation** | **Mutation Energy (kcal/mol)** | **Effect** | | --- | --- | --- | --- | | 1 | A:SER125>PHE | -1.17 | STABILIZING | | 2 | A:HIS71>PHE | -0.59 | STABILIZING | | 3 | A:THR171>PHE | -0.59 | STABILIZING | | 4 | A:GLY119>PHE | -0.34 | NEUTRAL | | 5 | A:CYS167>PHE | -0.33 | NEUTRAL | | 55 | A:LEU308>PHE | 0.58 | DESTABILIZING | | 56 | A:ALA98>PHE | 0.96 | DESTABILIZING | | 57 | A:ALA97>PHE | 1.15 | DESTABILIZING | | 58 | A:THR54>PHE | 1.89 | DESTABILIZING | | 59 | A:SER50>PHE | 2.07 | DESTABILIZING |   The table reports up to 5 lowest energy and up to 5 highest energy mutations. For the full list of results click the links in the Results section. | | --- | --- | --- | --- | --- | --- | --- | --- | --- | --- | --- | --- | --- | --- | --- | --- | --- | --- | --- | --- | --- | --- | --- | --- | --- | --- | --- | --- | --- | --- | --- | --- | --- | --- | --- | --- | --- | --- | --- | --- | --- | --- | --- | --- | --- | | | | --- | --- | --- | --- | --- | --- | --- | --- | --- | --- | --- | --- | --- | --- | --- | --- | --- | --- | --- | --- | --- | --- | --- | --- | --- | --- | --- | --- | --- | --- | --- | --- | --- | --- | --- | --- | --- | --- | --- | --- | --- | --- | --- | --- | --- | --- | --- | --- | --- | | | |
| --- | --- | --- | --- | --- | --- | --- | --- | --- | --- | --- | --- | --- | --- | --- | --- | --- | --- | --- | --- | --- | --- | --- | --- | --- | --- | --- | --- | --- | --- | --- | --- | --- | --- | --- | --- | --- | --- | --- | --- | --- | --- | --- | --- | --- | --- | --- | --- | --- | --- | --- | --- | --- | --- |
| | 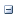**Results** | | --- | | | |
| | **Summary** |  | | --- | --- |  | | | 59 Single Mutations generated for G22-4OAQ-A-Zn20-SP_model_1 | | --- | | | --- | --- | | | | **Index** | **Mutation** | **Mutation Energy (kcal/mol)** | **Effect** | | --- | --- | --- | --- | | 1 | A:THR171>TRP | -0.89 | STABILIZING | | 2 | A:SER125>TRP | -0.77 | STABILIZING | | 3 | A:HIS71>TRP | -0.61 | STABILIZING | | 4 | A:ALA120>TRP | -0.48 | NEUTRAL | | 5 | A:CYS48>TRP | -0.45 | NEUTRAL | | 55 | A:TYR123>TRP | 0.58 | DESTABILIZING | | 56 | A:ALA121>TRP | 0.61 | DESTABILIZING | | 57 | A:LEU309>TRP | 1.57 | DESTABILIZING | | 58 | A:ALA97>TRP | 3.21 | DESTABILIZING | | 59 | A:ALA98>TRP | 3.31 | DESTABILIZING |   The table reports up to 5 lowest energy and up to 5 highest energy mutations. For the full list of results click the links in the Results section. | | --- | --- | --- | --- | --- | --- | --- | --- | --- | --- | --- | --- | --- | --- | --- | --- | --- | --- | --- | --- | --- | --- | --- | --- | --- | --- | --- | --- | --- | --- | --- | --- | --- | --- | --- | --- | --- | --- | --- | --- | --- | --- | --- | --- | --- | | | | --- | --- | --- | --- | --- | --- | --- | --- | --- | --- | --- | --- | --- | --- | --- | --- | --- | --- | --- | --- | --- | --- | --- | --- | --- | --- | --- | --- | --- | --- | --- | --- | --- | --- | --- | --- | --- | --- | --- | --- | --- | --- | --- | --- | --- | --- | --- | --- | --- | | | |
| | 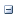**Results** | | --- | | | |
| | | | 59 Single Mutations generated for G22-4OAQ-A-Zn20-SP_model_1 | | --- | | | --- | --- | | | | **Index** | **Mutation** | **Mutation Energy (kcal/mol)** | **Effect** | | --- | --- | --- | --- | | 1 | A:ALA121>ASN | -0.93 | STABILIZING | | 2 | A:SER50>ASN | -0.40 | NEUTRAL | | 3 | A:SER125>ASN | -0.18 | NEUTRAL | | 4 | A:GLN60>ASN | -0.15 | NEUTRAL | | 5 | A:CYS48>ASN | -0.12 | NEUTRAL | | 55 | A:LEU308>ASN | 0.36 | NEUTRAL | | 56 | A:TYR123>ASN | 0.45 | NEUTRAL | | 57 | A:ALA98>ASN | 0.48 | NEUTRAL | | 58 | A:ALA97>ASN | 0.71 | DESTABILIZING | | 59 | A:TRP59>ASN | 0.72 | DESTABILIZING |   The table reports up to 5 lowest energy and up to 5 highest energy mutations. For the full list of results click the links in the Results section. | | --- | --- | --- | --- | --- | --- | --- | --- | --- | --- | --- | --- | --- | --- | --- | --- | --- | --- | --- | --- | --- | --- | --- | --- | --- | --- | --- | --- | --- | --- | --- | --- | --- | --- | --- | --- | --- | --- | --- | --- | --- | --- | --- | --- | --- | | | | --- | --- | --- | --- | --- | --- | --- | --- | --- | --- | --- | --- | --- | --- | --- | --- | --- | --- | --- | --- | --- | --- | --- | --- | --- | --- | --- | --- | --- | --- | --- | --- | --- | --- | --- | --- | --- | --- | --- | --- | --- | --- | --- | --- | --- | --- | --- | --- | --- | | | |
| | 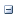**Results** | | --- | | | |
| | | | 54 Single Mutations generated for G23-4OAQ-A-Zn20-SP_model_1 | | --- | | | --- | --- | | | | **Index** | **Mutation** | **Mutation Energy (kcal/mol)** | **Effect** | | --- | --- | --- | --- | | 1 | A:ALA121>PHE | -0.83 | STABILIZING | | 2 | A:THR171>PHE | -0.64 | STABILIZING | | 3 | A:ALA98>PHE | -0.49 | NEUTRAL | | 4 | A:CYS167>PHE | -0.42 | NEUTRAL | | 5 | A:LEU308>PHE | -0.31 | NEUTRAL | | 50 | A:HIS71>PHE | 0.40 | NEUTRAL | | 51 | A:LEU309>PHE | 0.49 | NEUTRAL | | 52 | A:TRP59>PHE | 0.76 | DESTABILIZING | | 53 | A:ALA97>PHE | 1.57 | DESTABILIZING | | 54 | A:SER50>PHE | 2.34 | DESTABILIZING |   The table reports up to 5 lowest energy and up to 5 highest energy mutations. For the full list of results click the links in the Results section. | | --- | --- | --- | --- | --- | --- | --- | --- | --- | --- | --- | --- | --- | --- | --- | --- | --- | --- | --- | --- | --- | --- | --- | --- | --- | --- | --- | --- | --- | --- | --- | --- | --- | --- | --- | --- | --- | --- | --- | --- | --- | --- | --- | --- | --- | | | | --- | --- | --- | --- | --- | --- | --- | --- | --- | --- | --- | --- | --- | --- | --- | --- | --- | --- | --- | --- | --- | --- | --- | --- | --- | --- | --- | --- | --- | --- | --- | --- | --- | --- | --- | --- | --- | --- | --- | --- | --- | --- | --- | --- | --- | --- | --- | --- | --- | |
| | **Results** 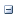 | | --- | |
| | | | 54 Single Mutations generated for G23-4OAQ-A-Zn20-SP_model_1 | | --- | | | --- | --- | | | | **Index** | **Mutation** | **Mutation Energy (kcal/mol)** | **Effect** | | --- | --- | --- | --- | | 1 | A:ALA98>TRP | -0.71 | STABILIZING | | 2 | A:LEU308>TRP | -0.58 | STABILIZING | | 3 | A:THR171>TRP | -0.56 | STABILIZING | | 4 | A:HIS71>TRP | -0.47 | NEUTRAL | | 5 | A:ALA168>TRP | -0.30 | NEUTRAL | | 50 | A:ASN124>TRP | 0.55 | DESTABILIZING | | 51 | A:SER125>TRP | 0.84 | DESTABILIZING | | 52 | A:LEU309>TRP | 1.21 | DESTABILIZING | | 53 | A:ALA97>TRP | 1.76 | DESTABILIZING | | 54 | A:THR54>TRP | 2.24 | DESTABILIZING |   The table reports up to 5 lowest energy and up to 5 highest energy mutations. For the full list of results click the links in the Results section. | | --- | --- | --- | --- | --- | --- | --- | --- | --- | --- | --- | --- | --- | --- | --- | --- | --- | --- | --- | --- | --- | --- | --- | --- | --- | --- | --- | --- | --- | --- | --- | --- | --- | --- | --- | --- | --- | --- | --- | --- | --- | --- | --- | --- | --- | | | | --- | --- | --- | --- | --- | --- | --- | --- | --- | --- | --- | --- | --- | --- | --- | --- | --- | --- | --- | --- | --- | --- | --- | --- | --- | --- | --- | --- | --- | --- | --- | --- | --- | --- | --- | --- | --- | --- | --- | --- | --- | --- | --- | --- | --- | --- | --- | --- | --- | |
| | **Results** 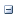 | | --- | |
| | | | 54 Single Mutations generated for G23-4OAQ-A-Zn20-SP_model_1 | | --- | | | --- | --- | | | | **Index** | **Mutation** | **Mutation Energy (kcal/mol)** | **Effect** | | --- | --- | --- | --- | | 1 | A:SER125>ASN | -0.25 | NEUTRAL | | 2 | A:CYS48>ASN | -0.12 | NEUTRAL | | 3 | A:CYS167>ASN | -0.11 | NEUTRAL | | 4 | A:ALA98>ASN | -0.11 | NEUTRAL | | 5 | A:GLN60>ASN | -0.10 | NEUTRAL | | 50 | A:HIS71>ASN | 0.56 | DESTABILIZING | | 51 | A:SER50>ASN | 0.68 | DESTABILIZING | | 52 | A:TYR123>ASN | 0.69 | DESTABILIZING | | 53 | A:TRP59>ASN | 1.01 | DESTABILIZING | | 54 | A:ALA97>ASN | 2.19 | DESTABILIZING |   The table reports up to 5 lowest energy and up to 5 highest energy mutations. For the full list of results click the links in the Results section. | | --- | --- | --- | --- | --- | --- | --- | --- | --- | --- | --- | --- | --- | --- | --- | --- | --- | --- | --- | --- | --- | --- | --- | --- | --- | --- | --- | --- | --- | --- | --- | --- | --- | --- | --- | --- | --- | --- | --- | --- | --- | --- | --- | --- | --- | | | | --- | --- | --- | --- | --- | --- | --- | --- | --- | --- | --- | --- | --- | --- | --- | --- | --- | --- | --- | --- | --- | --- | --- | --- | --- | --- | --- | --- | --- | --- | --- | --- | --- | --- | --- | --- | --- | --- | --- | --- | --- | --- | --- | --- | --- | --- | --- | --- | --- | |
| | **Results** 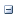 | | --- | |

| | **Summary** |  | | --- | --- |  | | | 52 Single Mutations generated for G31-4OAQ-A-Zn20-SP_model_1 | | --- | | | --- | --- | | | | **Index** | **Mutation** | **Mutation Energy (kcal/mol)** | **Effect** | | --- | --- | --- | --- | | 1 | A:HIS71>PHE | -0.75 | STABILIZING | | 2 | A:SER125>PHE | -0.69 | STABILIZING | | 3 | A:CYS167>PHE | -0.63 | STABILIZING | | 4 | A:THR171>PHE | -0.45 | NEUTRAL | | 5 | A:ALA98>PHE | -0.40 | NEUTRAL | | 48 | A:TRP59>PHE | 0.63 | DESTABILIZING | | 49 | A:SER50>PHE | 1.03 | DESTABILIZING | | 50 | A:THR54>PHE | 1.11 | DESTABILIZING | | 51 | A:ALA121>PHE | 1.36 | DESTABILIZING | | 52 | A:ALA97>PHE | 1.44 | DESTABILIZING |   The table reports up to 5 lowest energy and up to 5 highest energy mutations. For the full list of results click the links in the Results section. | | --- | --- | --- | --- | --- | --- | --- | --- | --- | --- | --- | --- | --- | --- | --- | --- | --- | --- | --- | --- | --- | --- | --- | --- | --- | --- | --- | --- | --- | --- | --- | --- | --- | --- | --- | --- | --- | --- | --- | --- | --- | --- | --- | --- | --- | | | | --- | --- | --- | --- | --- | --- | --- | --- | --- | --- | --- | --- | --- | --- | --- | --- | --- | --- | --- | --- | --- | --- | --- | --- | --- | --- | --- | --- | --- | --- | --- | --- | --- | --- | --- | --- | --- | --- | --- | --- | --- | --- | --- | --- | --- | --- | --- | --- | --- | |
| --- | --- | --- | --- | --- | --- | --- | --- | --- | --- | --- | --- | --- | --- | --- | --- | --- | --- | --- | --- | --- | --- | --- | --- | --- | --- | --- | --- | --- | --- | --- | --- | --- | --- | --- | --- | --- | --- | --- | --- | --- | --- | --- | --- | --- | --- | --- | --- | --- | --- | --- | --- |
| | 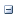**Results** | | --- | |

| | **Summary** |  | | --- | --- |  | | | 52 Single Mutations generated for G31-4OAQ-A-Zn20-SP_model_1 | | --- | | | --- | --- | | | | **Index** | **Mutation** | **Mutation Energy (kcal/mol)** | **Effect** | | --- | --- | --- | --- | | 1 | A:THR171>TRP | -1.07 | STABILIZING | | 2 | A:SER125>TRP | -0.93 | STABILIZING | | 3 | A:HIS71>TRP | -0.81 | STABILIZING | | 4 | A:ALA121>TRP | -0.75 | STABILIZING | | 5 | A:ALA98>TRP | -0.59 | STABILIZING | | 48 | A:LYS221>TRP | 0.01 | NEUTRAL | | 49 | A:ASN124>TRP | 0.31 | NEUTRAL | | 50 | A:ALA97>TRP | 0.80 | DESTABILIZING | | 51 | A:LEU309>TRP | 1.68 | DESTABILIZING | | 52 | A:THR54>TRP | 4.08 | DESTABILIZING |   The table reports up to 5 lowest energy and up to 5 highest energy mutations. For the full list of results click the links in the Results section. | | --- | --- | --- | --- | --- | --- | --- | --- | --- | --- | --- | --- | --- | --- | --- | --- | --- | --- | --- | --- | --- | --- | --- | --- | --- | --- | --- | --- | --- | --- | --- | --- | --- | --- | --- | --- | --- | --- | --- | --- | --- | --- | --- | --- | --- | | | | --- | --- | --- | --- | --- | --- | --- | --- | --- | --- | --- | --- | --- | --- | --- | --- | --- | --- | --- | --- | --- | --- | --- | --- | --- | --- | --- | --- | --- | --- | --- | --- | --- | --- | --- | --- | --- | --- | --- | --- | --- | --- | --- | --- | --- | --- | --- | --- | --- | | | |
| --- | --- | --- | --- | --- | --- | --- | --- | --- | --- | --- | --- | --- | --- | --- | --- | --- | --- | --- | --- | --- | --- | --- | --- | --- | --- | --- | --- | --- | --- | --- | --- | --- | --- | --- | --- | --- | --- | --- | --- | --- | --- | --- | --- | --- | --- | --- | --- | --- | --- | --- | --- | --- | --- |
| | 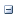**Results** | | --- | | | |
| | **Summary** |  | | --- | --- |  | | | 52 Single Mutations generated for G31-4OAQ-A-Zn20-SP_model_1 | | --- | | | --- | --- | | | | **Index** | **Mutation** | **Mutation Energy (kcal/mol)** | **Effect** | | --- | --- | --- | --- | | 1 | A:SER50>ASN | -0.66 | STABILIZING | | 2 | A:SER125>ASN | -0.43 | NEUTRAL | | 3 | A:GLN60>ASN | -0.39 | NEUTRAL | | 4 | A:THR122>ASN | -0.37 | NEUTRAL | | 5 | A:ALA98>ASN | -0.37 | NEUTRAL | | 48 | A:ARG356>ASN | 0.03 | NEUTRAL | | 49 | A:HIS71>ASN | 0.18 | NEUTRAL | | 50 | A:TRP59>ASN | 0.36 | NEUTRAL | | 51 | A:TYR123>ASN | 0.43 | NEUTRAL | | 52 | A:ALA97>ASN | 0.59 | DESTABILIZING |   The table reports up to 5 lowest energy and up to 5 highest energy mutations. For the full list of results click the links in the Results section. | | --- | --- | --- | --- | --- | --- | --- | --- | --- | --- | --- | --- | --- | --- | --- | --- | --- | --- | --- | --- | --- | --- | --- | --- | --- | --- | --- | --- | --- | --- | --- | --- | --- | --- | --- | --- | --- | --- | --- | --- | --- | --- | --- | --- | --- | | | | --- | --- | --- | --- | --- | --- | --- | --- | --- | --- | --- | --- | --- | --- | --- | --- | --- | --- | --- | --- | --- | --- | --- | --- | --- | --- | --- | --- | --- | --- | --- | --- | --- | --- | --- | --- | --- | --- | --- | --- | --- | --- | --- | --- | --- | --- | --- | --- | --- | |
| | **Results** 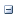 | | --- | |

| | **Summary** |  | | --- | --- |  | | | 51 Single Mutations generated for G32-4OAQ-A-Zn20-SP_model_1 | | --- | | | --- | --- | | | | **Index** | **Mutation** | **Mutation Energy (kcal/mol)** | **Effect** | | --- | --- | --- | --- | | 1 | A:ALA121>PHE | -2.30 | STABILIZING | | 2 | A:ALA97>PHE | -1.87 | STABILIZING | | 3 | A:SER125>PHE | -0.77 | STABILIZING | | 4 | A:SER50>PHE | -0.75 | STABILIZING | | 5 | A:LEU283>PHE | -0.58 | STABILIZING | | 47 | A:LYS221>PHE | 0.01 | NEUTRAL | | 48 | A:GLY259>PHE | 0.04 | NEUTRAL | | 49 | A:TRP59>PHE | 0.43 | NEUTRAL | | 50 | A:THR171>PHE | 0.51 | DESTABILIZING | | 51 | A:THR54>PHE | 1.03 | DESTABILIZING |   The table reports up to 5 lowest energy and up to 5 highest energy mutations. For the full list of results click the links in the Results section. | | --- | --- | --- | --- | --- | --- | --- | --- | --- | --- | --- | --- | --- | --- | --- | --- | --- | --- | --- | --- | --- | --- | --- | --- | --- | --- | --- | --- | --- | --- | --- | --- | --- | --- | --- | --- | --- | --- | --- | --- | --- | --- | --- | --- | --- | | | | --- | --- | --- | --- | --- | --- | --- | --- | --- | --- | --- | --- | --- | --- | --- | --- | --- | --- | --- | --- | --- | --- | --- | --- | --- | --- | --- | --- | --- | --- | --- | --- | --- | --- | --- | --- | --- | --- | --- | --- | --- | --- | --- | --- | --- | --- | --- | --- | --- | | | |
| --- | --- | --- | --- | --- | --- | --- | --- | --- | --- | --- | --- | --- | --- | --- | --- | --- | --- | --- | --- | --- | --- | --- | --- | --- | --- | --- | --- | --- | --- | --- | --- | --- | --- | --- | --- | --- | --- | --- | --- | --- | --- | --- | --- | --- | --- | --- | --- | --- | --- | --- | --- | --- | --- |
| | 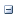**Results** | | --- | | | |
| | **Summary** |  | | --- | --- |  | | | 51 Single Mutations generated for G32-4OAQ-A-Zn20-SP_model_1 | | --- | | | --- | --- | | | | **Index** | **Mutation** | **Mutation Energy (kcal/mol)** | **Effect** | | --- | --- | --- | --- | | 1 | A:LEU309>TRP | -1.56 | STABILIZING | | 2 | A:ALA121>TRP | -1.54 | STABILIZING | | 3 | A:SER50>TRP | -0.99 | STABILIZING | | 4 | A:CYS48>TRP | -0.75 | STABILIZING | | 5 | A:TYR123>TRP | -0.61 | STABILIZING | | 47 | A:ILE260>TRP | 0.01 | NEUTRAL | | 48 | A:LYS221>TRP | 0.01 | NEUTRAL | | 49 | A:ARG217>TRP | 0.01 | NEUTRAL | | 50 | A:SER125>TRP | 1.34 | DESTABILIZING | | 51 | A:THR54>TRP | 1.51 | DESTABILIZING |   The table reports up to 5 lowest energy and up to 5 highest energy mutations. For the full list of results click the links in the Results section. | | --- | --- | --- | --- | --- | --- | --- | --- | --- | --- | --- | --- | --- | --- | --- | --- | --- | --- | --- | --- | --- | --- | --- | --- | --- | --- | --- | --- | --- | --- | --- | --- | --- | --- | --- | --- | --- | --- | --- | --- | --- | --- | --- | --- | --- | | | | --- | --- | --- | --- | --- | --- | --- | --- | --- | --- | --- | --- | --- | --- | --- | --- | --- | --- | --- | --- | --- | --- | --- | --- | --- | --- | --- | --- | --- | --- | --- | --- | --- | --- | --- | --- | --- | --- | --- | --- | --- | --- | --- | --- | --- | --- | --- | --- | --- | |
| | **Results** 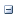 | | --- | |
| | **Summary** |  | | --- | --- |  | | | 51 Single Mutations generated for G32-4OAQ-A-Zn20-SP_model_1 | | --- | | | --- | --- | | | | **Index** | **Mutation** | **Mutation Energy (kcal/mol)** | **Effect** | | --- | --- | --- | --- | | 1 | A:ALA121>ASN | -1.45 | STABILIZING | | 2 | A:SER50>ASN | -1.12 | STABILIZING | | 3 | A:ALA97>ASN | -0.98 | STABILIZING | | 4 | A:THR54>ASN | -0.71 | STABILIZING | | 5 | A:LEU308>ASN | -0.34 | NEUTRAL | | 47 | A:GLY259>ASN | 0.04 | NEUTRAL | | 48 | A:LEU197>ASN | 0.06 | NEUTRAL | | 49 | A:HIS71>ASN | 0.09 | NEUTRAL | | 50 | A:TYR123>ASN | 0.39 | NEUTRAL | | 51 | A:TRP59>ASN | 1.02 | DESTABILIZING |   The table reports up to 5 lowest energy and up to 5 highest energy mutations. For the full list of results click the links in the Results section. | | --- | --- | --- | --- | --- | --- | --- | --- | --- | --- | --- | --- | --- | --- | --- | --- | --- | --- | --- | --- | --- | --- | --- | --- | --- | --- | --- | --- | --- | --- | --- | --- | --- | --- | --- | --- | --- | --- | --- | --- | --- | --- | --- | --- | --- | | | | --- | --- | --- | --- | --- | --- | --- | --- | --- | --- | --- | --- | --- | --- | --- | --- | --- | --- | --- | --- | --- | --- | --- | --- | --- | --- | --- | --- | --- | --- | --- | --- | --- | --- | --- | --- | --- | --- | --- | --- | --- | --- | --- | --- | --- | --- | --- | --- | --- | |
| | **Results** 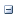 | | --- | |

| | **Summary** |  | | --- | --- |  | | | 51 Single Mutations generated for G24-4OAQ-A-Zn20-SP_model_1 | | --- | | | --- | --- | | | | **Index** | **Mutation** | **Mutation Energy (kcal/mol)** | **Effect** | | --- | --- | --- | --- | | 1 | A:ALA121>PHE | -1.14 | STABILIZING | | 2 | A:THR54>PHE | -0.99 | STABILIZING | | 3 | A:ASN124>PHE | -0.77 | STABILIZING | | 4 | A:SER50>PHE | -0.74 | STABILIZING | | 5 | A:VAL281>PHE | -0.62 | STABILIZING | | 47 | A:LEU309>PHE | 0.07 | NEUTRAL | | 48 | A:TYR123>PHE | 0.15 | NEUTRAL | | 49 | A:ALA97>PHE | 0.39 | NEUTRAL | | 50 | A:TRP59>PHE | 0.40 | NEUTRAL | | 51 | A:HIS71>PHE | 0.78 | DESTABILIZING |   The table reports up to 5 lowest energy and up to 5 highest energy mutations. For the full list of results click the links in the Results section. | | --- | --- | --- | --- | --- | --- | --- | --- | --- | --- | --- | --- | --- | --- | --- | --- | --- | --- | --- | --- | --- | --- | --- | --- | --- | --- | --- | --- | --- | --- | --- | --- | --- | --- | --- | --- | --- | --- | --- | --- | --- | --- | --- | --- | --- | | | | --- | --- | --- | --- | --- | --- | --- | --- | --- | --- | --- | --- | --- | --- | --- | --- | --- | --- | --- | --- | --- | --- | --- | --- | --- | --- | --- | --- | --- | --- | --- | --- | --- | --- | --- | --- | --- | --- | --- | --- | --- | --- | --- | --- | --- | --- | --- | --- | --- | | | |
| --- | --- | --- | --- | --- | --- | --- | --- | --- | --- | --- | --- | --- | --- | --- | --- | --- | --- | --- | --- | --- | --- | --- | --- | --- | --- | --- | --- | --- | --- | --- | --- | --- | --- | --- | --- | --- | --- | --- | --- | --- | --- | --- | --- | --- | --- | --- | --- | --- | --- | --- | --- | --- | --- |
| | 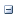**Results** | | --- | | | |
| | **Summary** |  | | --- | --- |  | | | 51 Single Mutations generated for G24-4OAQ-A-Zn20-SP_model_1 | | --- | | | --- | --- | | | | **Index** | **Mutation** | **Mutation Energy (kcal/mol)** | **Effect** | | --- | --- | --- | --- | | 1 | A:LEU309>TRP | -1.54 | STABILIZING | | 2 | A:LEU308>TRP | -1.46 | STABILIZING | | 3 | A:THR54>TRP | -0.99 | STABILIZING | | 4 | A:CYS167>TRP | -0.74 | STABILIZING | | 5 | A:SER125>TRP | -0.63 | STABILIZING | | 47 | A:CYS48>TRP | 0.18 | NEUTRAL | | 48 | A:THR171>TRP | 0.33 | NEUTRAL | | 49 | A:SER50>TRP | 0.83 | DESTABILIZING | | 50 | A:ALA121>TRP | 0.92 | DESTABILIZING | | 51 | A:ALA97>TRP | 1.17 | DESTABILIZING |   The table reports up to 5 lowest energy and up to 5 highest energy mutations. For the full list of results click the links in the Results section. | | --- | --- | --- | --- | --- | --- | --- | --- | --- | --- | --- | --- | --- | --- | --- | --- | --- | --- | --- | --- | --- | --- | --- | --- | --- | --- | --- | --- | --- | --- | --- | --- | --- | --- | --- | --- | --- | --- | --- | --- | --- | --- | --- | --- | --- | | | | --- | --- | --- | --- | --- | --- | --- | --- | --- | --- | --- | --- | --- | --- | --- | --- | --- | --- | --- | --- | --- | --- | --- | --- | --- | --- | --- | --- | --- | --- | --- | --- | --- | --- | --- | --- | --- | --- | --- | --- | --- | --- | --- | --- | --- | --- | --- | --- | --- | |
| | **Results** 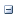 | | --- | |
| | **Summary** |  | | --- | --- |  | | | 51 Single Mutations generated for G24-4OAQ-A-Zn20-SP_model_1 | | --- | | | --- | --- | | | | **Index** | **Mutation** | **Mutation Energy (kcal/mol)** | **Effect** | | --- | --- | --- | --- | | 1 | A:SER50>ASN | -1.63 | STABILIZING | | 2 | A:ALA97>ASN | -1.03 | STABILIZING | | 3 | A:ALA121>ASN | -0.69 | STABILIZING | | 4 | A:THR54>ASN | -0.41 | NEUTRAL | | 5 | A:CYS48>ASN | -0.38 | NEUTRAL | | 47 | A:HIS71>ASN | 0.16 | NEUTRAL | | 48 | A:LEU308>ASN | 0.27 | NEUTRAL | | 49 | A:TYR123>ASN | 0.29 | NEUTRAL | | 50 | A:LEU283>ASN | 0.46 | NEUTRAL | | 51 | A:TRP59>ASN | 1.46 | DESTABILIZING |   The table reports up to 5 lowest energy and up to 5 highest energy mutations. For the full list of results click the links in the Results section. | | --- | --- | --- | --- | --- | --- | --- | --- | --- | --- | --- | --- | --- | --- | --- | --- | --- | --- | --- | --- | --- | --- | --- | --- | --- | --- | --- | --- | --- | --- | --- | --- | --- | --- | --- | --- | --- | --- | --- | --- | --- | --- | --- | --- | --- | | | | --- | --- | --- | --- | --- | --- | --- | --- | --- | --- | --- | --- | --- | --- | --- | --- | --- | --- | --- | --- | --- | --- | --- | --- | --- | --- | --- | --- | --- | --- | --- | --- | --- | --- | --- | --- | --- | --- | --- | --- | --- | --- | --- | --- | --- | --- | --- | --- | --- | |
| | **Results** 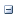 | | --- | |
